1 **Title: Early removal of the infrapatellar fat pad beneficially alters the pathogenesis of moderate**  
2 **stage idiopathic knee osteoarthritis in the Dunkin Hartley guinea pig**

3

4 Authors:

5 Maryam F. Afzali

6 Department of Microbiology, Immunology, Pathology

7 200 West Lake Street

8 Colorado State University

9 Fort Collins, CO 80523

10 [Mary.Afzali@colostate.edu](mailto:Mary.Afzali@colostate.edu)

11

12 Lauren B. Radakovich

13 Department of Microbiology, Immunology, Pathology

14 200 West Lake Street

15 Colorado State University

16 Fort Collins, CO 80523

17 [lauren4985@gmail.com](mailto:lauren4985@gmail.com)

18

19 Margaret A. Campbell

20 Department of Microbiology, Immunology, Pathology

21 200 West Lake Street

22 Colorado State University

23 Fort Collins, CO 80523

24 [magcamp95@gmail.com](mailto:magcamp95@gmail.com)

25

26 Joseph L. Sanford

27 Department of Microbiology, Immunology, Pathology

28 200 West Lake Street

29 Colorado State University

30 Fort Collins, CO 80523

31 [jlsanford13@gmail.com](mailto:jlsanford13@gmail.com)

32

33 Madeline M. Sykes

34 Department of Microbiology, Immunology, Pathology

35 200 West Lake Street

36 Colorado State University

37 Fort Collins, CO 80523

38 [Madeline.Sykes@colostate.edu](mailto:Madeline.Sykes@colostate.edu)

39

40 Angela J. Marolf

41 Department of Environmental and Radiological Health Sciences

42 123 Flint Cancer Center

43 Colorado State University

44 Fort Collins, CO 80523

45 [Angela.Marolf@colostate.edu](mailto:Angela.Marolf@colostate.edu)

46

47 Tammy H. Donahue

48 Department of Biomedical Engineering

49 The University of Memphis

50 Memphis, Tennessee 38152

51 [Tammy.H@memphis.edu](mailto:Tammy.H@memphis.edu)

52

53 Kelly S. Santangelo (Corresponding Author)  
54 Department of Microbiology, Immunology, Pathology  
55 200 West Lake Street  
56 Colorado State University  
57 Fort Collins, CO 80521  
58 [Kelly.Santangelo@colostate.edu](mailto:Kelly.Santangelo@colostate.edu)

59

60

61

62

63

64

65

66

67

68

69

70

71

72

73

74

75

76

77

78

79 **Abstract.**

80 **Background:** The infrapatellar fat pad (IFP) is the largest adipose deposit in the knee; however, its  
81 contributions to the homeostasis of this organ remain unknown. To determine the influence of this depot  
82 on joint health, this study determined the progression of osteoarthritis (OA) following excision of the IFP  
83 in a rodent model of naturally-occurring disease.

84 **Methods:** Male Dunkin-Hartley guinea pigs (n=10) received surgical removal of the IFP in one knee at 3  
85 months of age; contralateral knees received sham surgery as matched internal controls. Treadmill-based  
86 gait analysis was performed prior to IFP removal and monthly thereafter. Animals were harvested at 7  
87 months of age. Both knees were processed for microcomputed tomography (microCT), histopathology,  
88 transcript expression analyses, and immunohistochemistry (IHC).

89 **Results:** Fibrous connective tissue (FCT) developed in place of the native fat pad. Gait demonstrated no  
90 significant differences between IFP removal and contralateral limbs. MicroCT OA scores were improved  
91 in knees with the FCT. Histopathology confirmed maintenance of articular cartilage structure,  
92 proteoglycan content, and chondrocyte cellularity in FCT-containing knees. Transcript analyses revealed  
93 decreased expression of adipose-related molecules and inflammatory mediators in FCTs compared to  
94 IFPs. This was corroborated via IHC for select inflammatory mediators.

95 **Discussion/Conclusion:** Formation of the FCT resulted in reduced OA-associated changes in both bone  
96 and cartilage. A decrease in inflammatory mediators at transcript and protein levels may be associated  
97 with these improvements. The IFP may therefore play a role in the pathogenesis of knee OA in this strain,  
98 with removal prior to disease onset appearing to have short-term benefits.

99

100 **Keywords:** osteoarthritis, infrapatellar fat pad, gait, inflammation, Hartley guinea pig

101

102 **Running Title:** Early IFP removal reduces knee osteoarthritis

103

[Click here to view linked References](#)

## 1 **Introduction/Background.**

2 Primary osteoarthritis (OA), particularly knee OA, currently burdens greater than 273 million  
3 people globally<sup>1</sup>. As a leading cause of pain and disability, OA is a major contributor to decreased quality  
4 of life<sup>2</sup>. Consequently, more than 1 million people undergo knee arthroscopy or joint replacement surgery  
5 each year due to end-stage OA in the United States<sup>3</sup>, alone, with the annual economic loss to Americans  
6 approaching \$200 billion<sup>4</sup>. Unfortunately, there are no therapeutic regimens able to restore damaged  
7 cartilage to its normal phenotype or slow the progression of joint degeneration<sup>5</sup>. This reflects a need to  
8 improve our current understanding of pathophysiology of the disease, which is associated with both  
9 inflammatory and biomechanical causes<sup>6</sup>.

10 The knee is composed of many tissue types, including a number of continuous but distinct  
11 adipose depots; specifically, the infrapatellar fat pad (IFP), the posterior knee fat pad, the quadriceps fat  
12 pad, and the pre-femoral fat pad<sup>7</sup>. The IFP is the largest of these and is found in the anterior aspect of the  
13 joint in the space shaped by the patella, femoral condyles, and tibial plateau. In spite of its bulk, the exact  
14 functions of the IFP are not completely understood. The main role is thought to be facilitating the  
15 distribution of synovial fluid across the knee joint, thereby providing lubrication<sup>8-10</sup>. It also likely supplies  
16 shock absorbance from mechanical forces, knee joint stability, and may prevent instability and/or injury  
17 associated with loading forces to the knee joint<sup>10,11</sup>. However, *ex vivo* work performed on cadavers  
18 revealed that resection of the IFP decreased tibial rotation of the knee<sup>12</sup>. From this, the authors  
19 extrapolated that the IFP may contribute to dictating the range of motion of the knee joint.

20 Despite this uncertainty, the IFP is considered a player in overall knee joint homeostasis and there  
21 is evidence to support its part in the pathogenesis of knee joint OA<sup>8-15</sup>. In particular, the IFP is comprised  
22 of a network of adipocytes, fibroblasts, leukocytes (primarily macrophages and lymphocytes), and  
23 collagen matrix<sup>7-9</sup>. As such, it is positioned to be a source of inflammatory mediators and/or immune  
24 modulation that may contribute to OA<sup>7-16</sup>. For example, a study utilizing human tissues demonstrated that  
25 IFP-derived adipocyte conditioned media induced a pro-inflammatory response in T lymphocytes that  
26 resulted in increased proliferation and cytokine production<sup>16</sup>. In addition, Distal et al. have shown that

27 interleukin (IL)-6 secretion from the IFP of women with knee OA was more than twice that of  
28 subcutaneous thigh fat<sup>17</sup>.

29 Hoffa's disease, sometimes called hoffitis, is a disease of the IFP (also been referred to as Hoffa's  
30 fat pad). The pathophysiology of this disorder is not well documented; however, several mechanisms have  
31 been implicated, including acute trauma, microtrauma, and over-solicitation (repeated rotation and  
32 hyperextension)<sup>18</sup>. Regardless of the inciting cause, patients present with limitation of knee extension.  
33 Subsequent magnetic resonance imaging highlights signal abnormalities in the IFP along the path of the  
34 adipose ligament<sup>19-21</sup>. Conservative approaches are proposed as a first-line of therapy; however, if  
35 response to these options is unsuccessful and/or the disease becomes chronic, arthroscopic  
36 resection/removal remains the next treatment of choice. In particular, individuals with this condition  
37 experience pain relief from undergoing arthroscopic subtotal removal of this adipose depot<sup>22</sup>.

38 Given the above, we aimed to determine if unilateral removal of the IFP would alter the  
39 pathogenesis of knee joint OA in an animal model of primary disease. The aims of this study were two-  
40 fold: 1) to determine whether gait changes, an indication of possible symptom modification, would occur;  
41 and 2) to assess potential disease modification. We employed the Hartley guinea pig for this study, as it is  
42 a valuable rodent model of idiopathic OA with histopathologic lesions similar to those seen in people<sup>23,24</sup>.  
43 We postulated that the IFP acts as a local source of inflammation in this model<sup>23</sup> and that, by surgically  
44 removing it, we might improve OA outcomes by eliminating a source of negative mediators.

45

## 46 **Methods.**

### 47 *Animals.*

48 All procedures were approved by the Institutional Animal Care and Use Committee and performed in  
49 accordance with the NIH Guide for the Care of Use of Laboratory Animals. Sample size was determined  
50 from a pilot study focused on histologic assessment of OA as the primary outcome. Using a within group  
51 error of 0.5 and a detectable contrast of 0.5 in a linear regression model, power associated with an alpha  
52 level of 0.05 was calculated as 0.95 with a sample size of 10. Thus, 10 8-week-old male Dunkin-Hartley

53 guinea pigs were purchased from a commercial vendor (Charles River Laboratories, Wilmington, MA).  
54 Animals were maintained at the University's Laboratory Animal Resources housing facilities and were  
55 monitored daily by a veterinarian. All guinea pigs were singly-housed in solid bottom cages and provided  
56 standard chow, hay cubes, and water *ad libitum*. Sixteen male Hartley guinea pigs of the same age, from a  
57 coincident but unrelated project, were utilized as an untreated control group for body weight comparisons.

58

#### 59 *Surgical removal of the IFP.*

60 Resection of the IFP was performed on 12-week-old animals. After medial parapatellar arthrotomy of the  
61 right knee, the patella was displaced cranially with the knee in extension to permit access to the femoral  
62 groove. The IFP was then exposed medially to allow dissection and removal. The patella was repositioned  
63 and the skin incision closed. An identical sham procedure, with minor manipulation but without removal  
64 of the IFP, was performed on the left knee and served as a matched internal control for each animal.

65

#### 66 *Treadmill-based gait analysis*

67 Obligatory gait analysis was performed using a DigiGait™ treadmill system (Mouse Specifics, Inc.,  
68 Framingham, MA, USA). Animals were acclimated to the apparatus over a 2-week period. Data  
69 collection was performed by the same handlers during the same time period (8:00AM to 12:00PM); the  
70 order in which animals were analyzed was randomly selected. Baseline gait analysis was performed the  
71 day before IFP removal surgery. Subsequent data were collected every 4 weeks after surgery, with the  
72 final time point occurring the day before termination.

73

#### 74 *Tissue collection.*

75 Animals were harvested at 7 months of age. Body weights were recorded; animals were transferred to a  
76 CO<sub>2</sub> chamber for euthanasia. Hind limbs were removed at the coxofemoral joint. The lengths of the left  
77 and right femurs were measured using calipers. The left and right hind limbs were then placed in 10%  
78 neutral buffered formalin for 48 hours and transferred to phosphate buffer saline (PBS) for

79 microcomputed tomography (microCT) analysis. After microCT, limbs were placed in 12.5% solution of  
80 ethylenediaminetetraacetic acid (EDTA) at pH 7 for decalcification. EDTA was replaced twice weekly for  
81 6 weeks.

82

### 83 *MicroCT.*

84 Knee joints were scanned in PBS using the Inveon microPET/CT system (Siemens Medical Solutions,  
85 Malvern PA), with a voxel size of 18  $\mu\text{m}$ , a voltage of 100 kV, and an exposure time of 1356 ms. Clinical  
86 features of boney changes of OA were scored using a published whole joint grading scheme<sup>25</sup>. Features  
87 graded include: presence/size and location of osteophytes, subchondral bone cystic changes, subchondral  
88 bone sclerosis, articular bone lysis, and intraarticular soft tissue mineralization. Images were scored by a  
89 board-certified veterinary radiologist (AJM) blinded to limb identification.

90

### 91 *Histologic Grading of OA.*

92 Following decalcification and paraffin-embedding, three sagittal 5 $\mu\text{m}$  sections were made through each  
93 knee joint: (i) mid-sagittal slices were used for histologic evaluation of the IFP; and sagittal slices through  
94 both the (ii) medial and (iii) lateral compartments were utilized to assess OA changes in four sites (medial  
95 tibia, lateral tibia, medial femur, and lateral femur) using OARSI recommended criteria<sup>24</sup>. The mid-  
96 sagittal sections were stained with hematoxylin and eosin (H&E) and Masson's trichrome stain to confirm  
97 structural modifications. The medial and lateral compartments were stained with toluidine blue for OA  
98 grading. The OARSI published grading scheme is based upon species-specific features of OA including:  
99 articular cartilage structure, proteoglycan content, cellularity, and tidemark integrity. Two blinded  
100 veterinary pathologists (LBR and KSS) performed histological grading. Scores from each of the four  
101 anatomic locations were summed to obtain a total knee joint OA score for each right and left hind limb.  
102 An intraclass correlation coefficient of 0.9 for between-reviewer consistency was calculated; the few  
103 minor discrepancies identified were resolved prior to statistical analysis.



104

105 *Gene Expression using Nanostring technology.*

106 Total ribonucleic acid (RNA) was isolated from either the IFP or replacement tissue that remained in  
107 formalin-fixed paraffin-embedded blocks following acquisition of adequate sections for histopathology  
108 and immunohistochemistry (IHC) using a commercially available kit specifically designed for such  
109 (Roche, Basel, Switzerland). A custom set of guinea pig-specific probes were designed and manufactured  
110 by NanoString Technologies (Seattle, WA) for the following genes: adiponectin (ADIPOQ), leptin (LEP),  
111 and fatty acid synthetase (FASN), nuclear factor kappa-B transcription complex (NF- $\kappa$ B p65 & NF- $\kappa$ B  
112 p50), nuclear receptor subfamily 4 group A member 2 (NR4A2), monocyte chemoattractant protein-1  
113 (MCP-1), complement component 3 (C3), and matrix metalloproteinase-2 (MMP-2) (Supplemental Table  
114 1). Per initial RNA quantification (Invitrogen Qubit 2.0 Fluorometer and RNA High Sensitivity Assay  
115 Kit, Thermo Fisher Scientific, Waltham, MA) and Fragment Analyzer quality control subsets (Fragment  
116 Analyzer Automated CE System and High Sensitivity RNA Assay Kit, Agilent Technologies), the  
117 optimal amount of total RNA (800.00ng) was hybridized with the custom code-set in an overnight  
118 incubation set to 65°C, followed by processing on the NanoString nCounter FLEX Analysis system.  
119 Results were reported as absolute transcript counts normalized to positive controls and three  
120 housekeeping genes (b-actin, succinate dehydrogenase, and glyceraldehyde-3-phosphate dehydrogenase).  
121 Any potential sample input variance was corrected by use of the housekeeping genes and application of a  
122 sample-specific correction factor to all target probes. Data analysis was conducted using nSolver software  
123 (NanoString Technologies).

124

125 *IHC and quantitative analysis.*

126 IHC was performed on mid-sagittal sections containing the IFP or replacement tissue using polyclonal  
127 rabbit antibodies to MCP-1 (Abcam ab9669) or NF- $\kappa$ B p65 (Abcam ab86299), each at a concentration of  
128 2.5  $\mu$ g/ml. Prior to staining, slides were incubated in citrate buffer for 5 hours at 55°C for antigen

129 retrieval, as recommend for skeletal tissues<sup>26</sup>. 2.5% normal goat serum was used as a blocking reagent.  
130 Slides were incubated in primary antibody overnight in a humidified chamber at 4°C, followed by a 30-  
131 minute incubation with a biotinylated goat anti-rabbit secondary antibody. Bone marrow hematopoietic  
132 cells and macrophages served as internal positive controls for each section. Negative assay controls –  
133 rabbit immunoglobulin at 2.5 µg/ml and secondary antibody, alone – did not result in background  
134 immunostaining. Sections were counterstained with hematoxylin, cover slipped, and imaged by light  
135 microscopy. Data was quantified as integrated optical density using ImagePro-Plus 7 Software (Media  
136 Cybernetics, Rockville, MD). Four 1-mm-wide regions of interest of the IFP and replacement tissue were  
137 analyzed for MCP-1 and Nf-kBp65 expression; data for each tissue type was averaged prior to statistical  
138 analysis.

139

#### 140 *Statistical analyses.*

141 Rationale for excluding individual values from data sets were determined prior to analysis and included  
142 whether an appropriate sample was unable to be collected, did not pass quality control parameters, or if  
143 integrity was compromised. Four guinea pigs were only amendable for treadmill data collection on some,  
144 but not all, collection dates. Two animals did not have appropriate sections available for the whole joint  
145 OA score. One animal did not have adequate tissue available for either RNA extraction or IHC. Exclusion  
146 of these animals resulted in: n=6 animals for treadmill-based gait results; n=8 for OARSI scoring; and  
147 n=9 for transcript expression and IHC results. All remaining outcomes included n=10 animals.

148

149 Statistical analyses were performed with GraphPad Prism 9.1.1 (La Jolla, CA) with significance set at  $p \leq$   
150 0.05. Data underwent normality and variance testing with the Shapiro-Wilk test. Normally distributed  
151 data with similar variance were compared using paired t-test<sup>†</sup> for normally distributed data; Wilcoxon  
152 matched-pairs signed rank test<sup>◇</sup> was used for non-normally distributed data.

153

154 **Results.**

155 *General Description of Study Animals.*

156 All guinea pigs remained clinically healthy throughout the study. There was no significant difference in  
157 body weight when this cohort was compared to 7-month-old Hartley guinea pigs utilized as untreated  
158 controls in a parallel but unrelated study (Supplemental Figure S1A). Mean total body weight was 1098 g  
159 (95% CI: 1042-1155 g) in the IFP removal group and 1100 g (95% CI: 1070-1130 g) in the control group.  
160 To ensure that potential differences in gait were not attributable to changes in skeletal properties, left and  
161 right femurs lengths from all IFP removal guinea pigs were measured. Femur lengths between the left  
162 [sham control (mean=45.38 mm; 95% CI: 44.89-45.87 mm)] and right (IFP removal [mean= 45.37; 95%  
163 CI: 44.88-45.87 mm]) hind limbs were not significantly different ( $P = 0.2345$ ) (Supplemental Figure  
164 S1B).

165

166 *Treadmill-based gait analyses.*

167 To assess whether removal of the IFP impacted the gait of each animal, we contrasted parameters for each  
168 matched hindlimb. The ventral view of a guinea pig (Figure 1A), digital video images (Figure 1B), and  
169 representative dynamic gait signals (Figure 1C) of a guinea pig walking on a transparent treadmill belt at  
170 35 cm/s are provided. No differences in midline distance (Figure 1D), stride length (Figure 1E), swing  
171 (Figure 1F), stance (Figure 1G), brake (Figure 1H) or propel (Figure 1I) were seen between the IFP  
172 removal and contralateral hindlimbs.

173

174 *Morphologic Description of H&E and Masson Trichrome Stained Slides.*

175 Haematoxylin and eosin (H&E) staining confirmed that the left (surgery sham control) knees retained the  
176 typical histological properties of IFP, including mature adipocytes, a stromal vascular fraction, and white  
177 blood cells (predominantly large and small mononuclear cells consistent with macrophages and  
178 lymphocytes, respectively) (Figure 2A). In contrast, right (IFP removal) hindlimbs exhibited development  
179 of a thick band of dense fibrous connective tissue (FCT) in the space previously occupied by the native

180 IFP (Figure 2B). Further histological examination with Masson Trichrome stain confirmed the increased  
181 collagenous nature of the FCT compared to the native IFP (Figure 2C & D; Supplemental Figure S2).

182

183 *MicroCT whole joint OA scores.*

184 Whole joint microCT OA scores provide a comprehensive assessment of bony changes observed in the  
185 tibia, femur, and patella of each animal. Four of the 10 IFP knees demonstrated bone sclerosis, as shown  
186 in Figure 3A (Supplemental Figure S3(C)). In addition, all IFP hind limbs presented with a mixture of  
187 small (< 1mm) and/or large ( $\geq$  1mm) osteophytes on multiple anatomical locations (medial and/or lateral  
188 tibia, patella, or femur), with 9 out of 10 of these knees having osteophytes in two or more locations  
189 Figure 3B (Supplemental Figure S3(A)-(B)). For FCT knees, no bone sclerosis was noted. Only 3 out of  
190 10 animals had small osteophytes present; of these 3 animals, 2 animals had small osteophytes on either  
191 the patella or femur, with 1 animal having osteophytes on both the tibia and femur Figure 3D  
192 (Supplemental Figure S3(A)-(B)). Of note, no evidence of articular bone lysis or mineralized intra-  
193 articular soft tissue were present within any knee joints. Cumulatively, OA scores were significantly  
194 higher in knees that contained the native IFP (range of 5 to 10) versus those with the replacement FCT  
195 (range of 0 to 5;  $P = 0.0020$ ) (Figure 3E).

196

197 *OARSI histology score.*

198 Representative lesions of both knees from the same animal are shown in Figure 4 (A) and (B). Histologic  
199 OA scores were significantly higher in IFP group compared to FCT containing knees [Figure 4 (C);  
200  $P=0.004$ ]. When medial and lateral compartments were analyzed independently, these compartments  
201 showed the same pattern (Supplemental Figure S4(A)-(B)). Figure 4 (A) shows irregular, undulated  
202 cartilage surface, and mild fibrillation and proteoglycan loss in the superficial zone of the tibia from the  
203 knee with the native IFP. Figure 4 (B) demonstrates a smooth cartilage surface and very mild  
204 proteoglycan loss in the knee with the FCT. Overall, the lower histological OA scores for the hind limbs

205 that underwent IFP removal confirmed a maintenance of articular cartilage surface, proteoglycan content,  
206 and chondrocyte cellularity (Supplemental Figure S4(C)-(F)).

207

208 *Transcript Expression analyses.*

209 *Components of adipose tissue.* As was expected given the histologic findings, mRNA levels revealed that  
210 the FCT had a lower expression of transcripts for ADIPOQ (P = 0.0039), LEP (P = 0.0005), and FASN  
211 (P= 0.0130) than the native IFP (Figure 5 A-C).

212 *Inflammatory/degradative mediators.* Compared to the IFP, the FCT also had decreased expression of  
213 mRNA for NF-kBp65 (P= 0.0039), NF-kB p50 (P=0.0117), NR4A2 (P=0.0273), C3 (P=0.0195), MCP-1  
214 (P=0.0117); MMP-2 was increased (P=0.0018) (Figure 5D-I).

215

216 *IHC for Local Inflammatory Responses.*

217 To confirm the transcript expression data, MCP-1 and NF-kB p65 at the protein level were evaluated to  
218 assess local inflammation in the native IFP versus the FCT (Figures 6 & 7). Similar to the above,  
219 immunostaining of both proteins was significantly lower in the FCT (P<0.0001).

220

## 221 **Discussion.**

222 In this animal model, histomorphologic examination of the knee joints revealed that removal of  
223 the IFP resulted in the development of a thick band of collagenous FCT in the space previously occupied  
224 by the native tissue. These microscopic findings were supported by transcript expression data, which  
225 demonstrated significantly decreased expression of key adipocyte-related molecules, ADIPOQ, LEP, and  
226 FASN. Humans undergoing total knee arthroplasty combined with IFP removal have demonstrated a  
227 similar expansion/proliferation of residual tissue in the remaining void, with evidence of tissue  
228 remodeling characterized by loss of fat cells and deposition of large quantities of densely packed collagen  
229 fibers<sup>27</sup>. These findings are also consistent with those of *Kumer et al.*<sup>28</sup>, who assessed clinical and  
230 functional outcomes of Hoffa's disease treated with high-portal arthroscopic resection and found that

231 adipose tissue was replaced by fibrous tissue in chronic cases<sup>28</sup>. Additionally, these findings date back to  
232 the hallmark study conducted by Drs. Hoffa and Becker, which described this replacement process as  
233 hyperplasia and granulation of the remaining tissue such that it became interspersed with strong fibrous  
234 strings. Ultimately, endothelial cells were joined to fibrous tissue without any intervening fat<sup>29</sup>.

235 Interestingly, the current study demonstrated that early removal of the IFP prior to disease onset  
236 in an animal model of primary OA appears to have short-term benefits. Specifically, clinical microCT and  
237 histological OA scores were worse in the knee containing native adipose tissue relative to the knee with  
238 the FCT. To the authors' knowledge, previous research in animal models of spontaneous OA have not  
239 reported the influence of IFP removal on disease pathogenesis. *Collins et al.*<sup>30</sup>, however, utilized a murine  
240 model of lipodystrophy that examined the direct contribution of adipose tissue in an injury model of post-  
241 traumatic osteoarthritis (PTOA) induced by destabilization of the medial meniscus (DMM). Their  
242 findings indicated that adipose tissue itself may promote PTOA susceptibility directly through adipokine  
243 signaling, triggering systemic inflammation that localizes within the joint. However, the direct  
244 mechanism in the case of PTOA remains to be determined<sup>31</sup>. While not analogous to our current work (as  
245 these studies focused on removal of the IFP at end stage OA), it should also be mentioned that numerous  
246 studies have investigated the effects of IFP excision in total knee arthroplasty/replacement (TKA/TKR) as  
247 it relates to Knee Society Score<sup>32-35</sup>. This scoring system is composed of five components: patient  
248 demographics, objective knee score (completed by the surgeon), patient expectations, patient satisfaction  
249 score, and, lastly, functional knee score (completed by the patient)<sup>35</sup>. To date, these studies have reported  
250 inconclusive/discrepant results in regards to either the benefit or drawback of IFP removal; recent reviews  
251 of the effect of IFP excision in TKA found no difference in anterior knee pain, range of motion, or  
252 function in the patient with OA<sup>33-35</sup>. Thus, our project is the first study to focus on the potential benefit of  
253 IFP removal on OA pathogenesis as a preventive therapy. In this regard, it is necessary to consider both  
254 the inflammatory and/or biomechanical benefit of the FCT versus the native IFP.

255 In terms of the inflammatory contribution of the IFP to OA, *Clockaerts et al.*<sup>7</sup> and others<sup>36,37</sup> have  
256 reported that this adipose depot, particularly in cases of obesity, can cumulatively secrete cytokines,

257 interferons, adipokines, and growth factors, all of which exert local signaling effects on articular cartilage  
258 and synovial cells<sup>7,36,37</sup>. Of interest, studies have reported that individual cellular components of the IFP  
259 may contribute to OA. First, this depot serves as both a site of inflammatory/immune cell infiltration,  
260 which can provide an origin of pro-inflammatory cytokines and MMP expression. These migrating cells,  
261 including macrophages and lymphocytes, also interact and influence resident adipocytes. Second,  
262 adipocytes, themselves, are capable of secreting certain molecular markers and products able to initiate a  
263 local inflammatory response<sup>36,37</sup>.

264 Evidence to support the different functional characteristics and/or inflammatory nature of the IFP  
265 versus FCT in the current work was provided by transcript expression data and confirmatory IHC  
266 findings. As mentioned above, it is established that elevated pro-inflammatory cytokines in OA joints  
267 play a role in cartilage homeostasis<sup>38-41</sup>. In particular, studies have shown that NF- $\kappa$ B participates in many  
268 OA-associated changes, including chondrocyte catabolism, chondrocyte survival, and synovial  
269 inflammation<sup>42,43</sup>. Specifically, NF- $\kappa$ B signaling pathways mediate critical events in the inflammatory  
270 response by promoting transcription of genes encoding for cytokines and stimulating production of  
271 MMPs by synoviocytes, macrophages cells, or chondrocytes<sup>5,42,43</sup>. Notably, injury-induced cartilage  
272 lesions were alleviated by the knockdown of this mediator by specific small interfering RNA in animal  
273 models<sup>44,45</sup>. Here, we demonstrated that the FCT had downregulated NF- $\kappa$ B and its related nuclear orphan  
274 receptor, NR4A2, as well as NF- $\kappa$ B regulated genes, MCP-1 and C3. Protein expression further  
275 confirmed local decrease of one key subunit of NF- $\kappa$ B and MCP-1 expression within the FCT. We  
276 postulate a reduction of these inflammatory mediators may have led to decreased OA changes. Of note,  
277 MMP-2 (gelatinase A, type IV collagenase) is one of the major extracellular matrix degrading proteases  
278 and has been shown to breakdown basement membrane, which consists mainly of collagen type IV,  
279 laminin and proteoglycans<sup>46,47</sup>. In the current study, we found it interesting that MMP-2 expression was  
280 increased in the FCT. This finding may reflect an inherent difference in the FCT versus native adipose  
281 tissue, or may indicate that this replacement tissue was still under remodeling at the time point  
282 investigated.

283 It is also plausible that the FCT provided a biomechanical advantage over the IFP. Evidence for  
284 laxity of the anterior cruciate ligament has been shown in Hartley guinea pigs compared to one control  
285 strain<sup>48</sup>. Given this, it may also be possible that the IFP experiences similar changes in mechanical  
286 properties over time, thereby contributing to overall joint laxity and subsequent OA. As conjecture, the  
287 FCT that developed in place of the IFP may have offered improved biomechanical properties such that it  
288 protected other joint tissues. Mechanical testing on whole joints and isolated IFP or FCT may provide  
289 insight into this possibility.

290 A computer-aided, treadmill-based system was utilized to identify potential alterations in gait  
291 parameters in this unilateral intervention. Here, we demonstrated that IFP removal in OA-prone guinea  
292 pigs did not result in gait changes between hindlimbs across the course of this study. Previous studies  
293 have concluded that, relative to a non-OA prone strain, aged Hartley guinea pigs had shorter stride lengths  
294 and slower swing speeds<sup>49</sup>. In spite of our documented decrease in structural OA, removal of the IFP  
295 compared to the limb with the native IFP did not provide any changes in midline distance, stride length,  
296 swing, stance, brake or propel time. This is perhaps unsurprising, as structural joint changes are not  
297 necessarily accompanied by direct correlations to presenting clinical signs, particularly in the short-  
298 term<sup>50</sup>.

299 Considerations that should be noted in regards to this study include the fact that the current  
300 assessment involves only male animals; continued work will address findings in female guinea pigs.  
301 Further, removal of the IFP occurred prior to OA onset, which may have limited clinical application for  
302 the typical patient with OA. Indeed, examining effects of IFP removal at additional time points in the  
303 course of knee OA progression is needed to dissect the long-term benefit of IFP removal on knee health.  
304 Further, it is not known whether changes in transcript and protein expression will correlate to clinical  
305 improvement, nor if the anti-inflammatory benefits and decreased OA outcomes seen in the present work  
306 will hold true in a longer-term scenario. Finally, we acknowledge that our study design utilized the  
307 contralateral knee as a sham control to focus on within animal contrasts and comparison. It may be  
308 important to examine bi-lateral IFP removal and/or a contralateral naïve control limb to account for



309 compensatory limb considerations. In spite of this, we have achieved a noteworthy delay of OA onset  
310 and/or progression in the Hartley guinea pig model.

311

### 312 **Acknowledgements.**

313 We would like to thank Crystal Richt and the staff at the University of Arizona Genetics Core.  
314 Additionally, we would like to acknowledge the Department of Laboratory Animal Resources at Colorado  
315 State University for their compassion and commitment to these animals. The Animal Imaging Shared  
316 Resource of the University of Colorado Cancer Center receives support from P30CA046934.

317

### 318 **Author contributions.**

319 Maryam Afzali ([mary.afzali@colostate.edu](mailto:mary.afzali@colostate.edu)), Lauren Radakovich ([lauren4985@gmail.com](mailto:lauren4985@gmail.com)), and Kelly  
320 Santangelo ([kelly.santangelo@colostate.edu](mailto:kelly.santangelo@colostate.edu)) take responsibility for the integrity of the work.

321 Study conception and design: KSS, LBR

322 Collection and assembly of data: MFA, LBR, MAC, JLS, MMS, AJM

323 Analysis and interpretation of the data: MFA, LBR, MAC, JLS, MMS, THD, KSS

324 Drafting of article: MFA, LBR

325 Critical revision of the article for important intellectual content: LBR, MAC, JLS, MMS, AJM, THD,

326 KSS

327 Final approval of the article: MFA, LBR, MAC, JLS, MMS, AJM, THD, KSS

328 Obtaining of funding: KSS

329

### 330 **Role of the funding source.**

331 NIH R21 AR073972 provided funding to support the acquisition, analysis, and interpretation of data.

332 LBR was supported by T32 OD-010437.

333

### 334 **Competing Interest Statement.**

335 No authors have any conflicts of interest to disclose for this work

336

337 **References.**

338 1. March L, Smith EU, Hoy DG, Cross MJ, Sanchez-Riera L, Blyth F, Buchbinder R, Vos T, Woolf AD.

339 Burden of disability due to musculoskeletal (MSK) disorders. *Best Pract Res Clin Rheumatol.* 2014

340 Jun;28(3):353-66. doi: 10.1016/j.berh.2014.08.002. Epub 2014 Nov 18. PMID: 25481420.

341

342 2. Sowers MR, Karvonen-Gutierrez CA. The evolving role of obesity in knee osteoarthritis. *Curr Opin*

343 *Rheumatol.* 2010 Sep;22(5):533-7. doi: 10.1097/BOR.0b013e32833b4682. PMID: 20485173.

344

345 3. Katz JN, Brownlee SA, Jones MH. The role of arthroscopy in the management of knee osteoarthritis.

346 *Best Pract Res Clin Rheumatol.* 2014 Feb;28(1):143-56. doi: 10.1016/j.berh.2014.01.008. PMID:

347 24792949.

348

349 4. Kotlarz H, Gunnarsson CL, Fang H, Rizzo JA. Insurer and out-of-pocket costs of osteoarthritis in the

350 US: evidence from national survey data. *Arthritis Rheum.* 2009 Dec;60(12):3546-53. doi:

351 10.1002/art.24984. PMID: 19950287.

352

353 5. Trippel SB, Ghivizzani SC, Nixon AJ. Gene-based approaches for the repair of articular cartilage. *Gene*

354 *Ther.* 2004 Feb;11(4):351-9. doi: 10.1038/sj.gt.3302201. PMID: 14724680.

355

356 6. Greene MA, Loeser RF. Aging-related inflammation in osteoarthritis. *Osteoarthritis Cartilage.* 2015

357 Nov;23(11):1966-71. doi: 10.1016/j.joca.2015.01.008. PMID: 26521742.

358

359 7. Clockaerts S, Bastiaansen-Jenniskens YM, Runhaar J, Van Osch GJ, Van Offel JF, Verhaar JA, De

360 Clerck LS, Somville J. The infrapatellar fat pad should be considered as an active osteoarthritic joint

- 361 tissue: a narrative review. *Osteoarthritis Cartilage*. 2010 Jul;18(7):876-82. doi:  
362 10.1016/j.joca.2010.03.014. Epub 2010 Apr 22. PMID: 20417297.
- 363
- 364 8. Santangelo KS, Radakovich LB, Fouts J, Foster MT. Pathophysiology of obesity on knee joint  
365 homeostasis: contributions of the infrapatellar fat pad. *Horm Mol Biol Clin Investig*. 2016 May  
366 1;26(2):97-108. doi: 10.1515/hmbci-2015-0067. PMID: 26812879.
- 367
- 368 9. Mace J, Bhatti W, Anand S. Infrapatellar fat pad syndrome: a review of anatomy, function, treatment  
369 and dynamics. *Acta Orthop Belg*. 2016 Mar;82(1):94-101. PMID: 26984660.
- 370
- 371 10. Van Beeck A, Clockaerts S, Somville J, Van Heeswijk JH, Van Glabbeek F, Bos PK, Reijman M.  
372 Does infrapatellar fat pad resection in total knee arthroplasty impair clinical outcome? A systematic  
373 review. *Knee*. 2013 Aug;20(4):226-31. doi:10.1016/j.knee.2013.01.005. Epub 2013 Apr 6. PMID:  
374 23566735.
- 375
- 376 11. Bohnsack M, Wilharm A, Hurschler C, Rühmann O, Stukenborg-Colsman C, Wirth CJ.  
377 Biomechanical and kinematic influences of a total infrapatellar fat pad resection on the knee. *Am J Sports*  
378 *Med*. 2004 Dec;32(8):1873-80. doi: 10.1177/0363546504263946. PMID: 15572315.
- 379
- 380 12. Iwata M, Ochi H, Hara Y, Tagawa M, Koga D, Okawa A, Asou Y. Initial responses of articular  
381 tissues in a murine high-fat diet-induced osteoarthritis model: pivotal role of the IPFP as a cytokine  
382 fountain. *PLoS One*. 2013 Apr 12;8(4):e60706. doi: 10.1371/journal.pone.0060706. PMID: 23593289.
- 383
- 384 13. Han W, Cai S, Liu Z, Jin X, Wang X, Antony B, Cao Y, Aitken D, Cicuttini F, Jones G, Ding C.  
385 Infrapatellar fat pad in the knee: is local fat good or bad for knee osteoarthritis? *Arthritis Res Ther*. 2014  
386 Jul 9;16(4):R145. doi: 10.1186/ar4607. PMID: 25008048

387

388 14. Ioan-Facsinay A, Kloppenburg M. An emerging player in knee osteoarthritis: the infrapatellar fat pad.

389 Arthritis Res Ther. 2013;15(6):225. doi: 10.1186/ar4422. PMID: 24367915.

390

391 15. Fu Y, Huebner JL, Kraus VB, Griffin TM. Effect of Aging on Adipose Tissue Inflammation in the

392 Knee Joints of F344BN Rats. J Gerontol A Biol Sci Med Sci. 2016 Sep;71(9):1131-40. doi:

393 10.1093/gerona/glv151. Epub 2015 Oct 8. PMID: 26450946

394

395 16. Gierman LM, Wopereis S, van El B, Verheij ER, Werff-van der Vat BJ, Bastiaansen-Jenniskens YM,

396 van Osch GJ, Kloppenburg M, Stojanovic-Susulic V, Huizinga TW, Zuurmond AM. Metabolic profiling

397 reveals differences in concentrations of oxylipins and fatty acids secreted by the infrapatellar fat pad of

398 donors with end-stage osteoarthritis and normal donors. Arthritis Rheum. 2013 Oct;65(10):2606-14. doi:

399 10.1002/art.38081. PMID: 23839996.

400

401 17. Distel E, Cadoudal T, Durant S, Poignard A, Chevalier X, Benelli C. The infrapatellar fat pad in knee

402 osteoarthritis: an important source of interleukin-6 and its soluble receptor. Arthritis Rheum. 2009

403 Nov;60(11):3374-7. doi: 10.1002/art.24881. PMID: 19877065.

404

405 18. Larbi A, Cyteval C, Hamoui M, Dallaudiere B, Zaqane H, Viala P, Ruyer A. Hoffa's disease: a report

406 on 5 cases. Diagn Interv Imaging. 2014 Nov;95(11):1079-84. doi: 10.1016/j.diii.2014.06.009. Epub 2014

407 Jul 7. PMID: 25018130.

408

409 19. Kosarek FJ, Helms CA. The MR appearance of the infrapatellar plica. AJR Am J Roentgenol. 1999

410 Feb;172(2):481-4. doi: 10.2214/ajr.172.2.9930807. PMID: 9930807.

411

- 412 20. Saddik D, McNally EG, Richardson M. MRI of Hoffa's fat pad. *Skeletal Radiol.* 2004 Aug;33(8):433-  
413 44. doi: 10.1007/s00256-003-0724-z. Epub 2004 Jun 19. PMID: 15221217.  
414
- 415 21. Barbier-Brion B, Lerais JM, Aubry S, Lepage D, Vidal C, Delabrousse E, Runge M, Kastler B.  
416 Magnetic resonance imaging in patellar lateral femoral friction syndrome (PLFFS): prospective case-  
417 control study. *Diagn Interv Imaging.* 2012 Mar;93(3):e171-82. doi:10.1016/j.diii.2012.01.005. Epub 2012  
418 Feb 25. PMID: 22421281.  
419
- 420 22. Doner GP, Noyes FR. Arthroscopic resection of fat pad lesions and infrapatellar contractures.  
421 *Arthrosc Tech.* 2014 Jun 23;3(3):e413-6. doi: 10.1016/j.eats.2014.04.002. PMID: 25126514.  
422
- 423 23. Radakovich LB, Marolf AJ, Culver LA, Santangelo KS. Calorie restriction with regular chow, but not  
424 a high-fat diet, delays onset of spontaneous osteoarthritis in the Hartley guinea pig model. *Arthritis Res*  
425 *Ther.* 2019 Jun 13;21(1):145. doi: 10.1186/s13075-019-1925-8. PMID: 31196172.  
426
- 427 24. Kraus VB, Huebner JL, DeGroot J, Bendele A. The OARSI histopathology initiative -  
428 recommendations for histological assessments of osteoarthritis in the guinea pig. *Osteoarthritis Cartilage.*  
429 2010;18 Suppl 3(Suppl 3):S35-52. doi:10.1016/j.joca.2010.04.015.  
430
- 431 25. Radakovich LB, Marolf AJ, Shannon JP, Pannone SC, Sherk VD, Santangelo KS. Development of a  
432 microcomputed tomography scoring system to characterize disease progression in the Hartley guinea pig  
433 model of spontaneous osteoarthritis. *Connect Tissue Res.* 2018 Nov;59(6):523-533. doi:  
434 10.1080/03008207.2017.1409218. Epub 2017 Dec 11. PMID: 29226725.  
435
- 436 26. Idleburg C, DeLassus EN, Novack DV. Immunohistochemistry of skeletal tissues. *Methods Mol Biol.*  
437 2015;1226:87-95. doi: 10.1007/978-1-4939-1619-1\_8. PMID: 25331045.

438

439 27. Abdul N, Dixon D, Walker A, Horabin J, Smith N, Weir DJ, Brewster NT, Deehan DJ, Mann DA,  
440 Borthwick LA. Fibrosis is a common outcome following total knee arthroplasty. *Sci Rep*. 2015 Nov  
441 10;5:16469. doi: 10.1038/srep16469. PMID: 26553967.

442

443 28. Kumar D, Alvand A, Beacon JP. Impingement of infrapatellar fat pad (Hoffa's disease): results of  
444 high-portal arthroscopic resection. *Arthroscopy*. 2007 Nov;23(11):1180-1186.e1. doi:  
445 10.1016/j.arthro.2007.05.013. PMID: 17986405.

446

447 29. Hoffa, A. The influence of the Adipose Tissue with Regards to the Pathology of the Knee Joint.  
448 *JAMA*. 1904; 43:795-796.

449

450 30. Collins KH, Lenz KL, Pollitt EN, Ferguson D, Hutson I, Springer LE, Oestreich AK, Tang R, Choi  
451 YR, Meyer GA, Teitelbaum SL, Pham CTN, Harris CA, Guilak F. Adipose tissue is a critical regulator of  
452 osteoarthritis. *Proc Natl Acad Sci U S A*. 2021 Jan 5;118(1):e2021096118. doi:  
453 10.1073/pnas.2021096118. PMID: 33443201

454

455 31. Moverley, R., Williams, D., Bardakos, N. *et al*. Removal of the infrapatellar fat pad during total knee  
456 arthroplasty: does it affect patient outcomes?. *International Orthopaedics (SICOT)* **38**, 2483–2487  
457 (2014). <https://doi.org/10.1007/s00264-014-2427-6>

458

459 32. Meneghini RM, Pierson JL, Bagsby D, Berend ME, Ritter MA, Meding JB. The effect of retropatellar  
460 fat pad excision on patellar tendon contracture and functional outcomes after total knee arthroplasty. *J*  
461 *Arthroplasty*. 2007 Sep;22(6 Suppl 2):47-50. doi: 10.1016/j.arth.2007.03.031. Epub 2007 Jul 27. PMID:  
462 17823015.

463

- 464 33. Pinsornsak P, Naratrikun K, Chumchuen S. The effect of infrapatellar fat pad excision on  
465 complications after minimally invasive TKA: a randomized controlled trial. *Clin Orthop Relat Res.* 2014  
466 Feb;472(2):695-701. doi: 10.1007/s11999-013-3321-z. Epub 2013 Oct 18. PMID: 24136801; PMCID:  
467 PMC3890161.
- 468
- 469 34. Khanna A, Gougoulas N, Longo UG, Maffuli N. Minimally invasive total knee arthroplasty: a  
470 systematic review. *Orthop Clin North Am.* 2009;40:479–489. doi: 10.1016/j.ocl.2009.05.003.
- 471
- 472 35. Scuderi GR, Bourne RB, Noble PC, Benjamin JB, Lonner JH, Scott WN. The new Knee Society Knee  
473 Scoring System. *Clin Orthop Rel. Res.* 2012 Jan;470(1):3-19. doi: 10.1007/s11999-011-2135-0. PMID:  
474 22045067.
- 475
- 476 36. Balistreri CR, Caruso C, Candore G. The role of adipose tissue and adipokines in obesity-related  
477 inflammatory diseases. *Mediators Inflamm.* 2010;2010:802078. doi: 10.1155/2010/802078. Epub 2010  
478 Jul 1. PMID: 20671929.
- 479
- 480 37. Bravo, B., Guisasola, M. C., Vaquero, J., Tirado, I., Gortazar, A. R., and Forriol, F. (2019). Gene  
481 expression, protein profiling, and chemotactic activity of infrapatellar fat pad mesenchymal stem cells in  
482 pathologies of the knee joint. *J. Cell Physiol.* 234, 18917–18927. doi: 10.1002/jcp.28532
- 483
- 484 38. Lago R, Gomez R, Otero M, Lago F, Gallego R, Dieguez C, Gomez-Reino JJ, Gualillo O. A new  
485 player in cartilage homeostasis: adiponectin induces nitric oxide synthase type II and pro-inflammatory  
486 cytokines in chondrocytes. *Osteoarthritis Cartilage.* 2008 Sep;16(9):1101-9. doi:  
487 10.1016/j.joca.2007.12.008. Epub 2008 Feb 7. PMID: 18261936.
- 488

- 489 39. Brouwers, H., von Hegedus, J., Toes, R., Kloppenburg, M., and Ioan-Facsinay, A. (2015). Lipid  
490 mediators of inflammation in rheumatoid arthritis and osteoarthritis. *Best Pract. Res. Clin. Rheumatol.* 29,  
491 741–755. doi: 10.1016/j.berh.2016.02.003
- 492
- 493 40. Hashimoto M, Nakasa T, Hikata T, Asahara H. Molecular network of cartilage homeostasis and  
494 osteoarthritis. *Med Res Rev.* 2008 May;28(3):464-81. doi: 10.1002/med.20113. PMID: 17880012.
- 495
- 496 41. Goldring MB, Marcu KB. Cartilage homeostasis in health and rheumatic diseases. *Arthritis Res Ther.*  
497 2009;11(3):224. doi: 10.1186/ar2592. Epub 2009 May 19. PMID: 19519926.
- 498
- 499 42. Pulai JI, Chen H, Im HJ, Kumar S, Hanning C, Hegde PS, Loeser RF. NF-kappa B mediates the  
500 stimulation of cytokine and chemokine expression by human articular chondrocytes in response to  
501 fibronectin fragments. *J Immunol.* 2005 May 1;174(9):5781-8. doi: 10.4049/jimmunol.174.9.5781.  
502 PMID: 15843581.
- 503
- 504 43. Wang Z, Qiu Y, Lu J, Wu N. Connective tissue growth factor promotes interleukin-1 $\beta$ -mediated  
505 synovial inflammation in knee osteoarthritis. *Mol Med Rep.* 2013 Sep;8(3):877-82. doi:  
506 10.3892/mmr.2013.1570. Epub 2013 Jul 4. PMID: 23827951.
- 507
- 508 44. Chen LX, Lin L, Wang HJ, Wei XL, Fu X, Zhang JY, Yu CL. Suppression of early experimental  
509 osteoarthritis by in vivo delivery of the adenoviral vector-mediated NF-kappaBp65-specific siRNA.  
510 *Osteoarthritis Cartilage.* 2008 Feb;16(2):174-84. doi: 10.1016/j.joca.2007.06.006. Epub 2007 Aug 8.  
511 PMID: 17686636.
- 512
- 513 45. Yan H, Duan X, Pan H, Holguin N, Rai MF, Akk A, Springer LE, Wickline SA, Sandell LJ, Pham  
514 CT. Suppression of NF- $\kappa$ B activity via nanoparticle-based siRNA delivery alters early cartilage responses



515 to injury. Proc Natl Acad Sci U S A. 2016 Oct 11;113(41):E6199-E6208. doi: 10.1073/pnas.1608245113.  
516 Epub 2016 Sep 28. Erratum in: Proc Natl Acad Sci U S A. 2017 May 9;114(19):E3871. PMID:  
517 27681622.  
518  
519 46. Li YY, McTiernan CF, Feldman AM. Interplay of matrix metalloproteinases, tissue inhibitors of  
520 metalloproteinases and their regulators in cardiac matrix remodeling. Cardiovasc Res. 2000  
521 May;46(2):214-24. doi: 10.1016/s0008-6363(00)00003-1. PMID: 10773225.  
522  
523 47. Li Z, Li L, Zielke HR, Cheng L, Xiao R, Crow MT, Stetler-Stevenson WG, Froehlich J, Lakatta EG.  
524 Increased expression of 72-kd type IV collagenase (MMP-2) in human aortic atherosclerotic lesions. Am  
525 J Pathol. 1996 Jan;148(1):121-8. PMID: 8546199; PMCID: PMC1861591.  
526  
527 48. Quasnicka HL, Anderson-MacKenzie JM, Tarlton JF, Sims TJ, Billingham ME, Bailey AJ. Cruciate  
528 ligament laxity and femoral intercondylar notch narrowing in early-stage knee osteoarthritis. Arthritis  
529 Rheum. 2005 Oct;52(10):3100-9. doi: 10.1002/art.21340. PMID: 16200589.  
530  
531 49. Santangelo KS, Kaeding AC, Baker SA, Bertone AL. Quantitative Gait Analysis Detects Significant  
532 Differences in Movement between Osteoarthritic and Nonosteoarthritic Guinea Pig Strains before and  
533 after Treatment with Flunixin Meglumine. Arthritis. 2014;2014:503519. doi: 10.1155/2014/503519. Epub  
534 2014 May 19. PMID: 24963402.  
535  
536 50. Wallace IJ, Bendele AM, Riew G, Frank EH, Hung HH, Holowka NB, Bolze AS, Venable EM,  
537 Yegian AK, Dingwall HL, Carmody RN, Grodzinsky AJ, Lieberman DE. Physical inactivity and knee  
538 osteoarthritis in guinea pigs. Osteoarthritis Cartilage. 2019 Nov;27(11):1721-1728. doi:  
539 10.1016/j.joca.2019.07.005. Epub 2019 Jul 11. PMID: 31302235.  
540

Figure 1. Treadmill-based gait analysis – schematics and data. [A] Video still-image showing a guinea pig running on a transparent treadmill (viewed from below) at 35 cm/s. [B] Placement for each paw is detected/illustrated from the photograph [A]. [C] Paw area in contact with the treadmill surface over time for a representative single paw (left hind limb), from which multiple stride indices can be obtained (labeled). Longitudinal data of IFP (blue, n=6) and FCT (red, n=6) limbs for midline distance [D], stride length [E], swing [F], stance [G], brake [H] and propel [I] time. P-values were determined by paired t-tests.

Figure 2. Representative mid-sagittal photomicrographs of a stifle joint from a control with the native IFP [A, C] and replacement tissue [B, D]; H&E [A, B] and Masson's trichrome [C, D], 2x objective. [A, C] Control knee joint from a 7-month-old guinea pig depicting the normal histoanatomic location of the unaltered IFP. [B, D] Knee joint from the same 7-month-old guinea pig four months after IFP removal. The IFP space is replaced with dense fibrous connective tissue (FCT).

Figure 3. Representative photomicrographs from microCT evaluation of knee joints from the same animal using the published scoring system (Radakovich et al., *Connect Tissue Res.* 2017). [A] Coronal and [B] sagittal section of a knee containing the native IFP. Sclerosis and osteophytes are present on the medial femoral condyle (coronal section, red arrow). An osteophyte is highlighted on the proximal patella (sagittal section, yellow arrow). [C] Coronal and [D] sagittal section of the knee containing the FCT. [E] MicroCT OA score(n=10) demonstrated a significant decrease in boney changes in the FCT knees. P-value was determined by Wilcoxon matched-pairs signed rank test. **\*\*P= 0.0020**.

Figure 4. Representative photomicrographs of toluidine blue-stained sections from medial compartments for OARSI scoring. [A] Irregular articular surface with mild fibrillation and proteoglycan loss is present in the superficial zone of the tibia from the knee containing the native IFP. [B] The contralateral knee from the same animal, which contains FCT, exhibits a smooth cartilage surface and very mild proteoglycan loss. [C] OARSI whole joint score (n=8) confirmed a significant statistical difference in cartilage and proteoglycan change. P-value was determined by Wilcoxon matched-pairs signed rank test<sup>◇</sup>. **\*\*P= 0.0078**

Figure 5. Normalized mRNA counts for adiponectin<sup>◇</sup> [A], leptin<sup>†</sup> [B], FASN<sup>†</sup> [C], NF-kB p65<sup>◇</sup> [D], NF-kBp50<sup>◇</sup> [E], NR4A2<sup>◇</sup> [F], MCP-1<sup>◇</sup> [G], C3<sup>◇</sup> [H], and MMP-2<sup>†</sup> [I] in IFP versus FCT (n=9). P-values were determined by paired t-tests<sup>†</sup> or Wilcoxon matched-pairs signed rank test<sup>◇</sup>. **\*\*\*P < 0.0005, \*\*P < 0.005 and \*P < 0.05**

Figure 6. Immunohistochemistry for MCP-1 expression in [A] IFP and [B] FCT knees from the same animal (n=9); 40X objective for main photo; 20X objective for inset. [C] Removal of the IFP resulted in a decrease in MCP-1 expression relative to the FCT. Data is based on quantitative analysis of MCP-1-stained tissue subtracted from IgG control tissue for all samples. P-value was determined by paired t-test<sup>†</sup>. **\*\*\*\*P < 0.0001**

Figure 7. Immunohistochemistry for NF-kB p65 transcription factor protein expression in [A] IFP and [B] FCT knees from the same animal (n=9); 40X objective for main photo; 20X objective for inset. NF-kB is a transcription factor that is known for regulating inflammatory

responses within inflammatory cells. [C] Compared to the native IFP, there was a decrease in p65 expression in the FCT. Data is based on quantitative analysis of p65 stained tissue subtracted from IgG control tissue for all samples. P-value was determined by paired t-test<sup>†</sup>. \*\*\*\* $P < 0.0001$

Supplemental Figure S1. Body weight [A] in 7-month Hartley guinea pig controls (n=16) and IFP removal groups (n=10). [B] Femur lengths (n=10) between IFP and FCT-containing limbs. Black line represents mean value.

Supplemental Figure S2. Quantitative analysis of Masson's Trichrome staining in IFP vs FCT (n=10). P-value was determined by paired t-test<sup>†</sup>. \*\*\*\* $P < 0.0001$

Supplemental Figure S3. Contributions to whole joint MicroCT OA score components. [A] Location of osteophytes<sup>◇</sup> (n=10, possible range of scores 0–9). Mean location of osteophytes score in the FCT was 0.900 (n = 10; 95% CI -0.1901-1.990) and 4.100 in the IFP (n = 10; 95% CI 3.063–5.137). [B] Size of osteophytes<sup>◇</sup> (n=10; possible range of scores 0-4). Mean size of osteophytes score in the FCT was 0.300 (n= 10; 95% CI -0.046–0.645) and 2.60 in the IFP (n =10; 95% CI 1.760–3.440). [C] Subchondral bone sclerosis<sup>◇</sup> (n=10; possible score of 0 for absence, 1 for presence). Mean score for subchondral bone sclerosis was 0.00 in the FCT (n=10; 95% CI 0 – 0) and 0.4 in the IFP (n = 10; 95% CI 0.031–0.764). Data with non-Gaussian distribution were compared using non-parametric Wilcoxon matched – pairs signed rank test<sup>◇</sup>. \*\* $P=0.0039$

Supplemental Figure S4. Contributions of individual components to whole joint OARSI score. [A] Medial compartment<sup>◇</sup> OARSI score (possible range of scores 0–42). Mean OARSI histologic score in the medial compartment of the FCT was 2.63 (n = 8; 95% CI 1.08-4.17) and 11.63 in the IFP (n = 8; 95% CI 8.28–14.97); \*\* $P=0.078$ . [B] Lateral compartment<sup>◇</sup> OARSI score (possible range of scores 0–42). Mean OARSI histologic score in the lateral compartment of the knee was 3.63 in the IFP (n= 8; 95% CI 2.29–4.96) and 1.75 in the FCT (n=8; 95% CI 0.68–2.82). [C] Articular cartilage structure (n=8; possible range of scores 0–32 for the sum of all compartments). Mean score for articular cartilage structure was 4.38 in the IFP (n = 8; 95% CI 2.77 – 5.98) and 1.63 in the FCT (n = 8; 95% CI 0.86–2.39); \* $P=0.0293$ . [D] Proteoglycan content<sup>†</sup> (n=8; possible range of scores 0–24 for the sum of all compartments). Mean score for proteoglycan content was 7.00 in the IFP (n = 8; 95% CI 5.66–8.34) and 2.50 in the FCT (n = 8; 95% CI 0.45–4.55); \*\* $P=0.0016$ . [E] Cellularity<sup>†</sup> (possible range of scores 0–12 for the sum of all compartments). Mean score for cellularity was 4.13 in the IFP (n = 8; 95% CI 2.68-5.57) and 0.88 in the FCT (n = 8; 95% CI -0.07 – 1.82); \*\* $P=0.0015$ . [F] Tidemark integrity<sup>◇</sup> (possible range of scores 0–4 for the sum of all compartments). Mean score for tidemark integrity was 0.25 in the IFP (n = 8) and 0 in the FCT (n = 8). Two animals were unable to be evaluated for whole joint OARSI histologic grading due to appropriate tissues sections being unavailable. Normally distributed data with similar variance were compared using paired t-tests<sup>†</sup>. Data with non-Gaussian distribution were compared using Wilcoxon matched-pairs signed rank test<sup>◇</sup>.

Figure 1. Treadmill-based Analysis

**A**

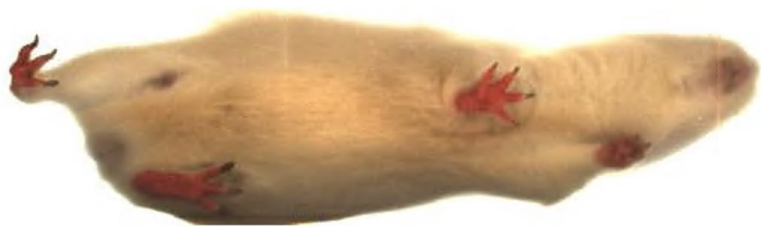

**B**

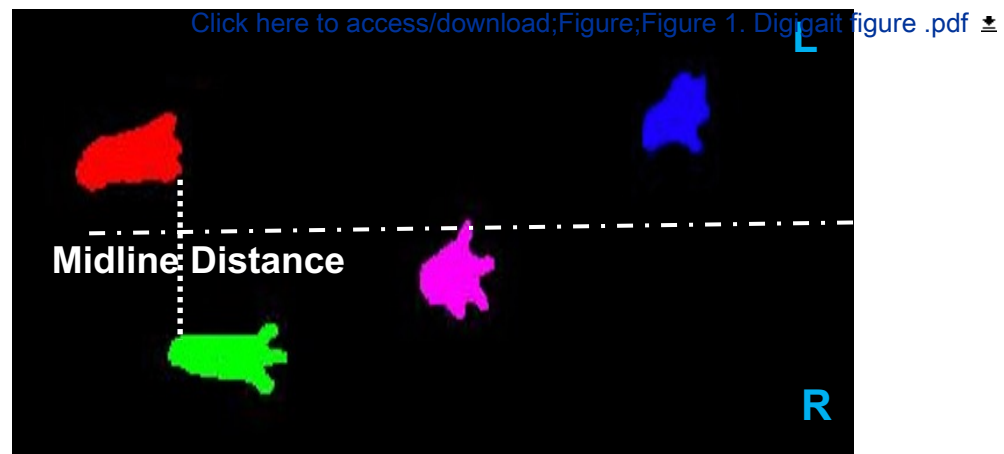

**C**

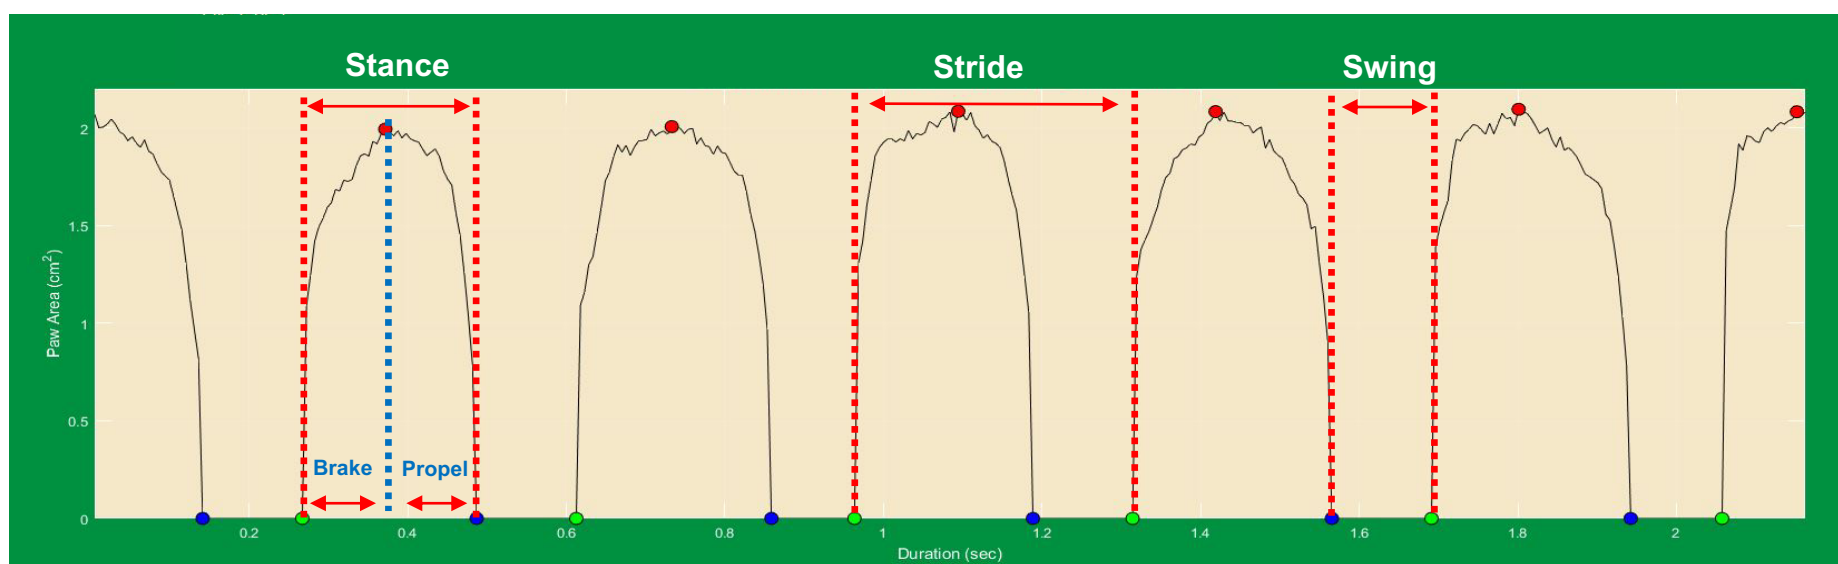

**D**

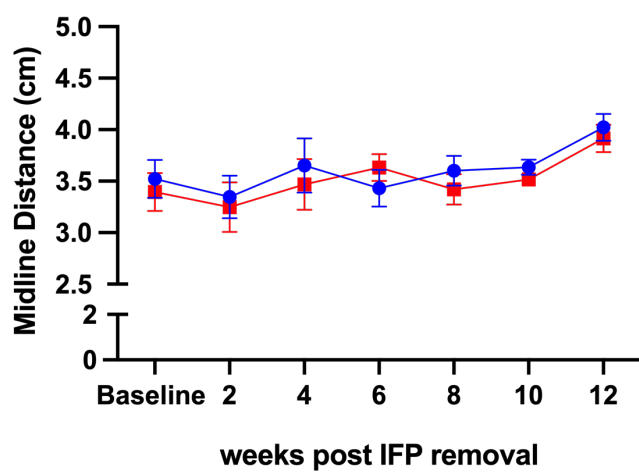

**E**

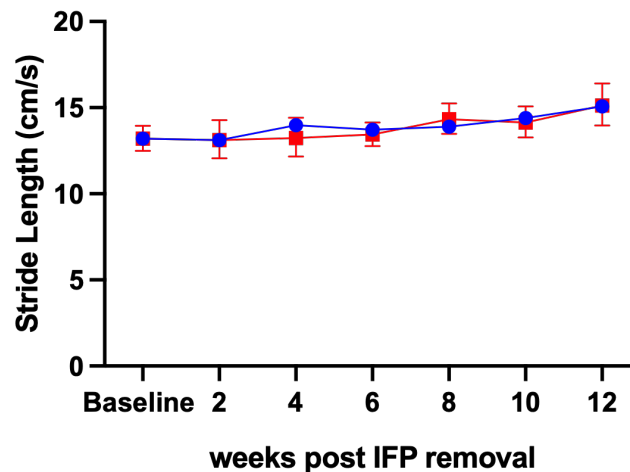

**F**

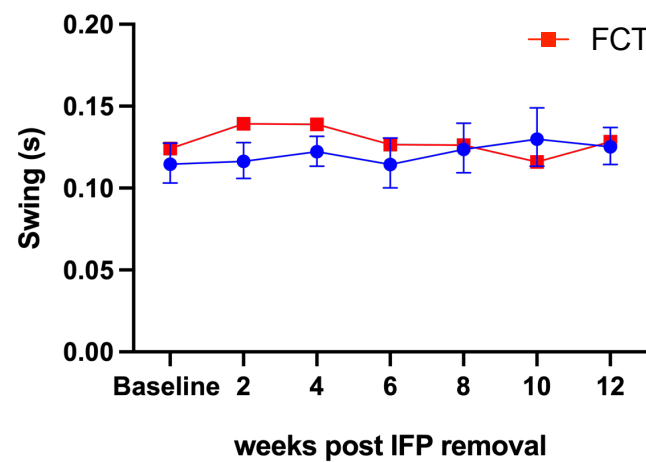

**G**

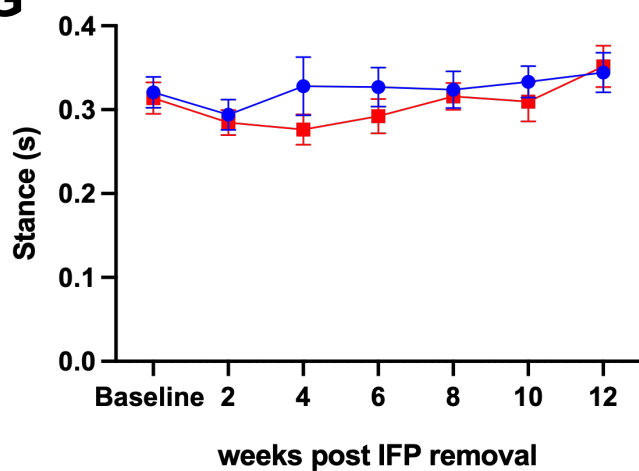

**H**

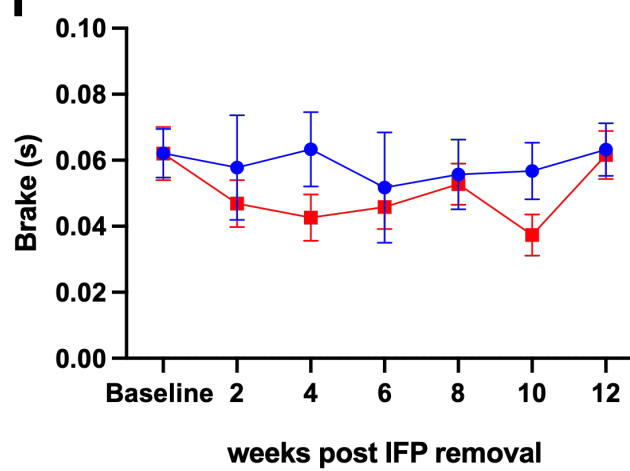

**I**

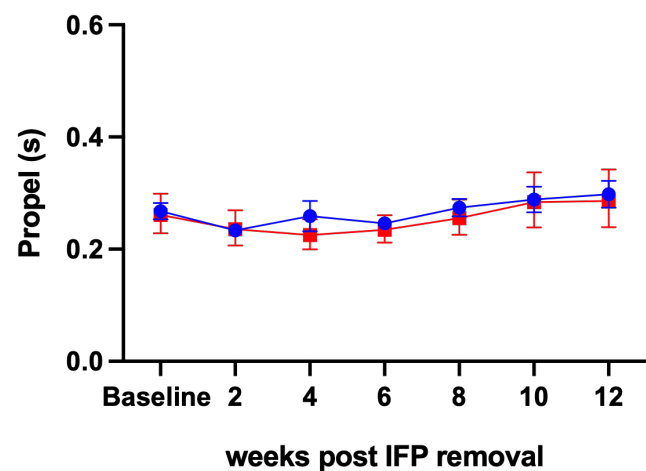

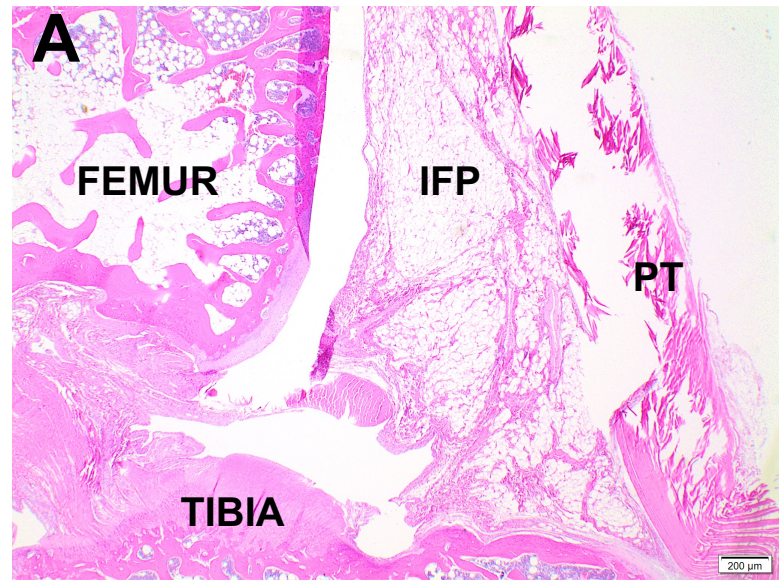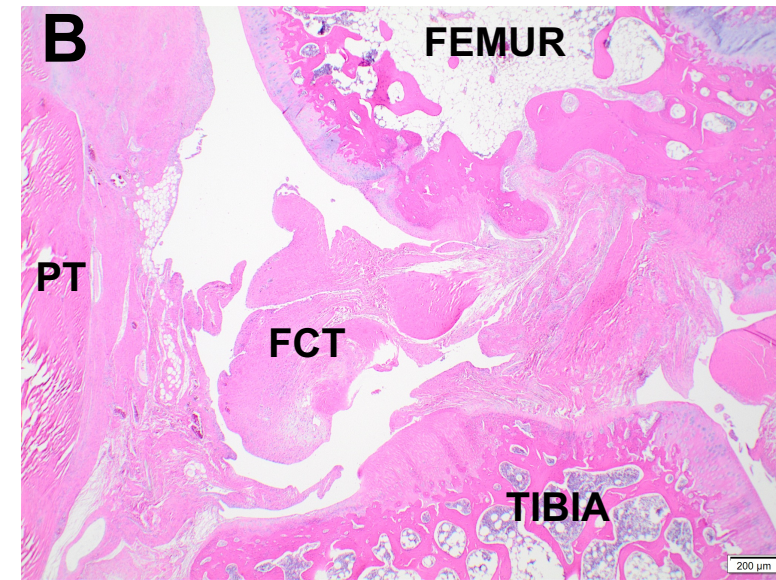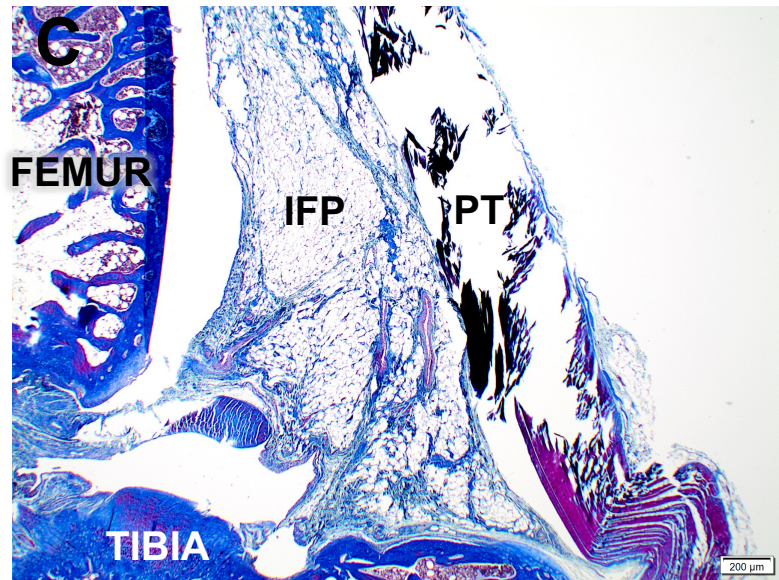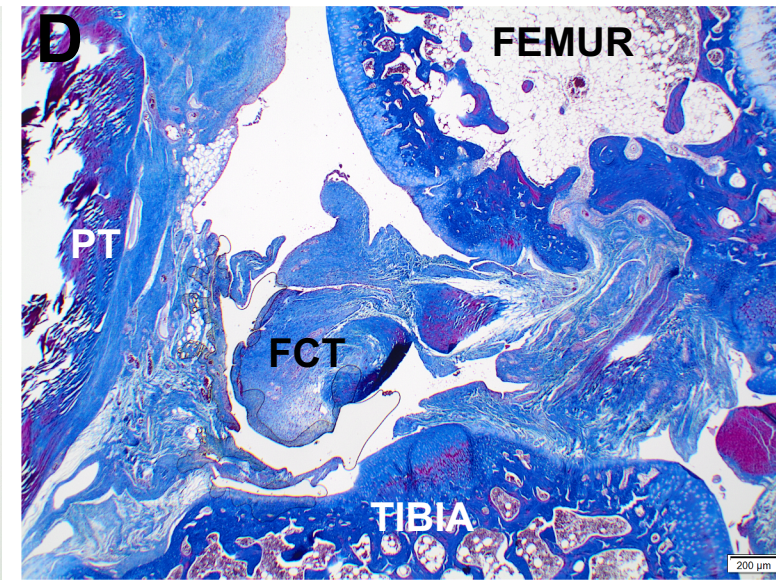

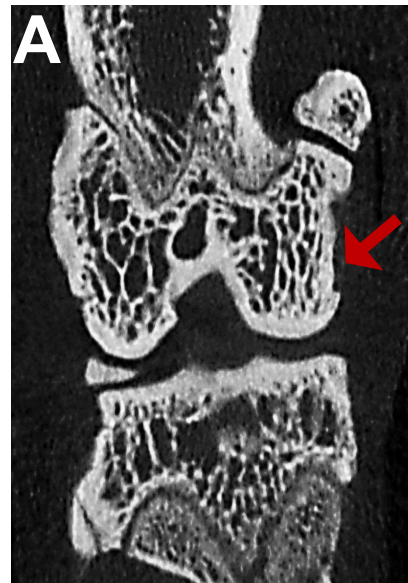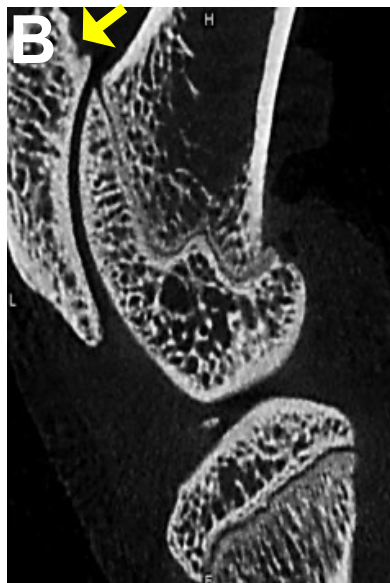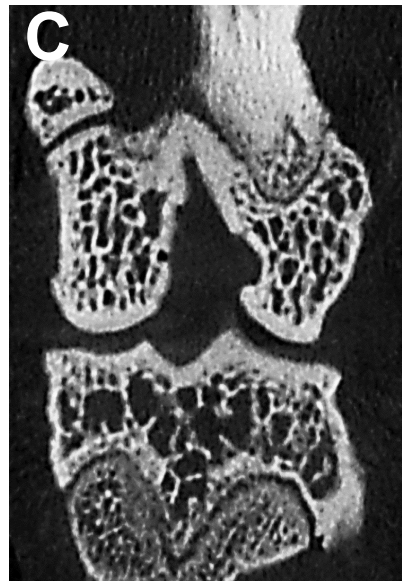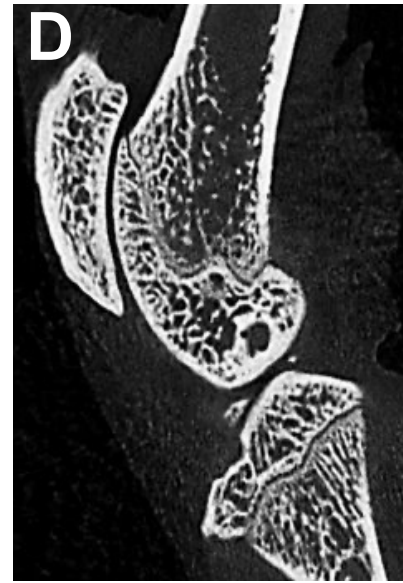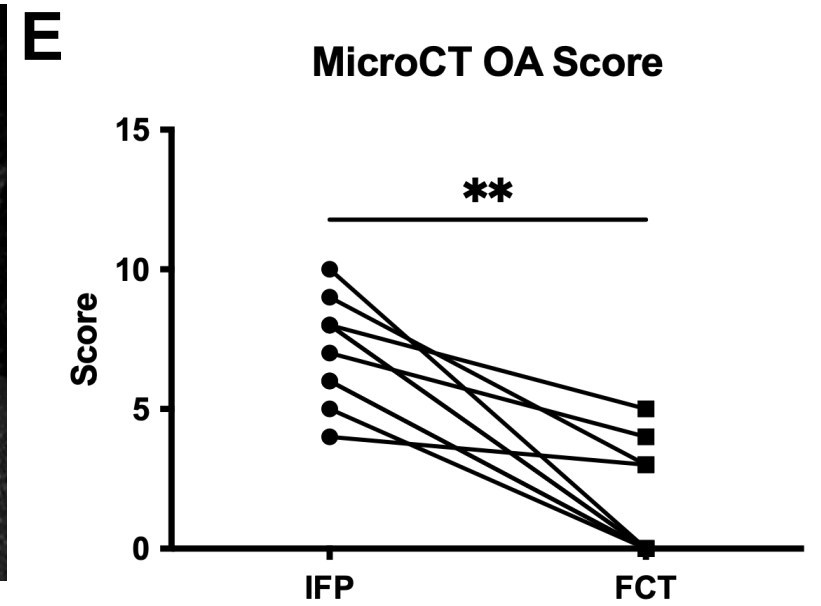

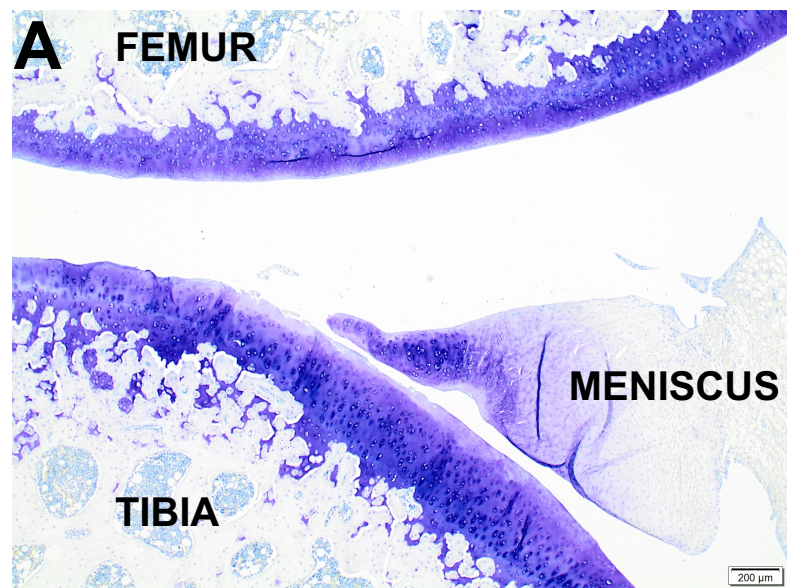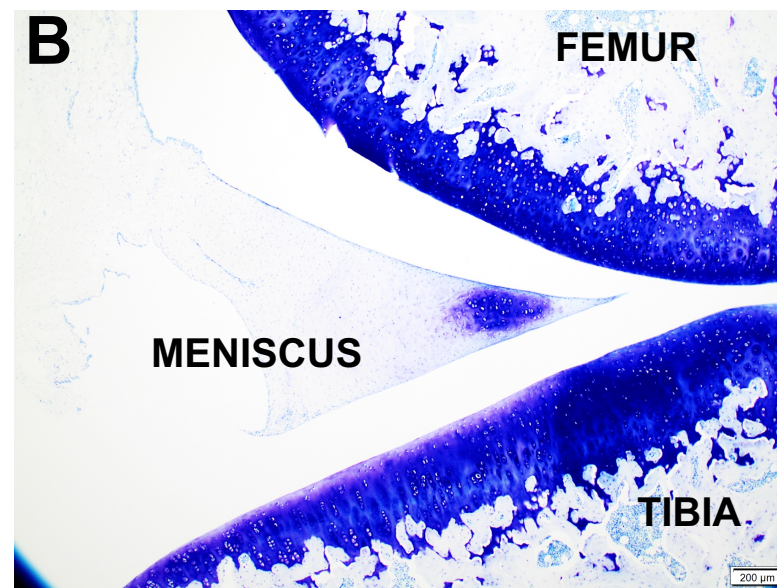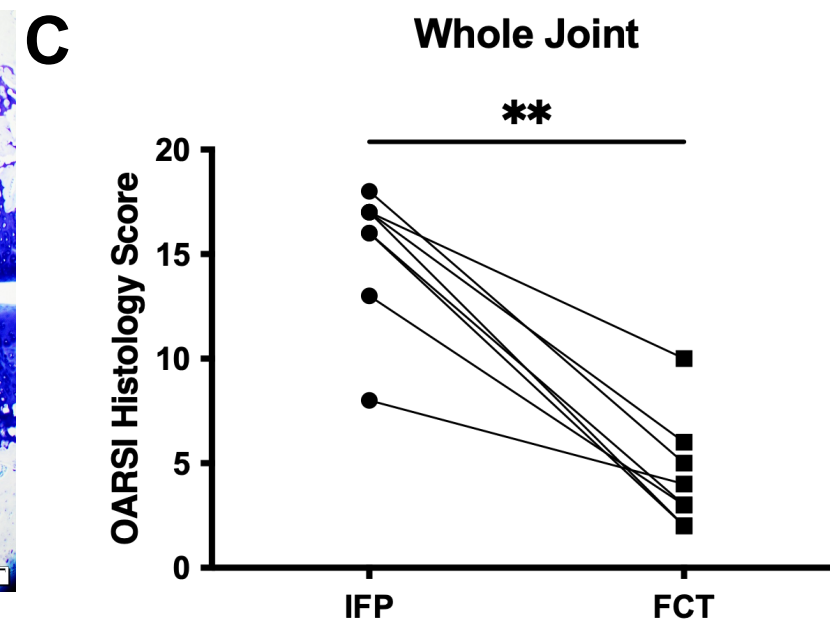

Figure 5. Normalized mRNA

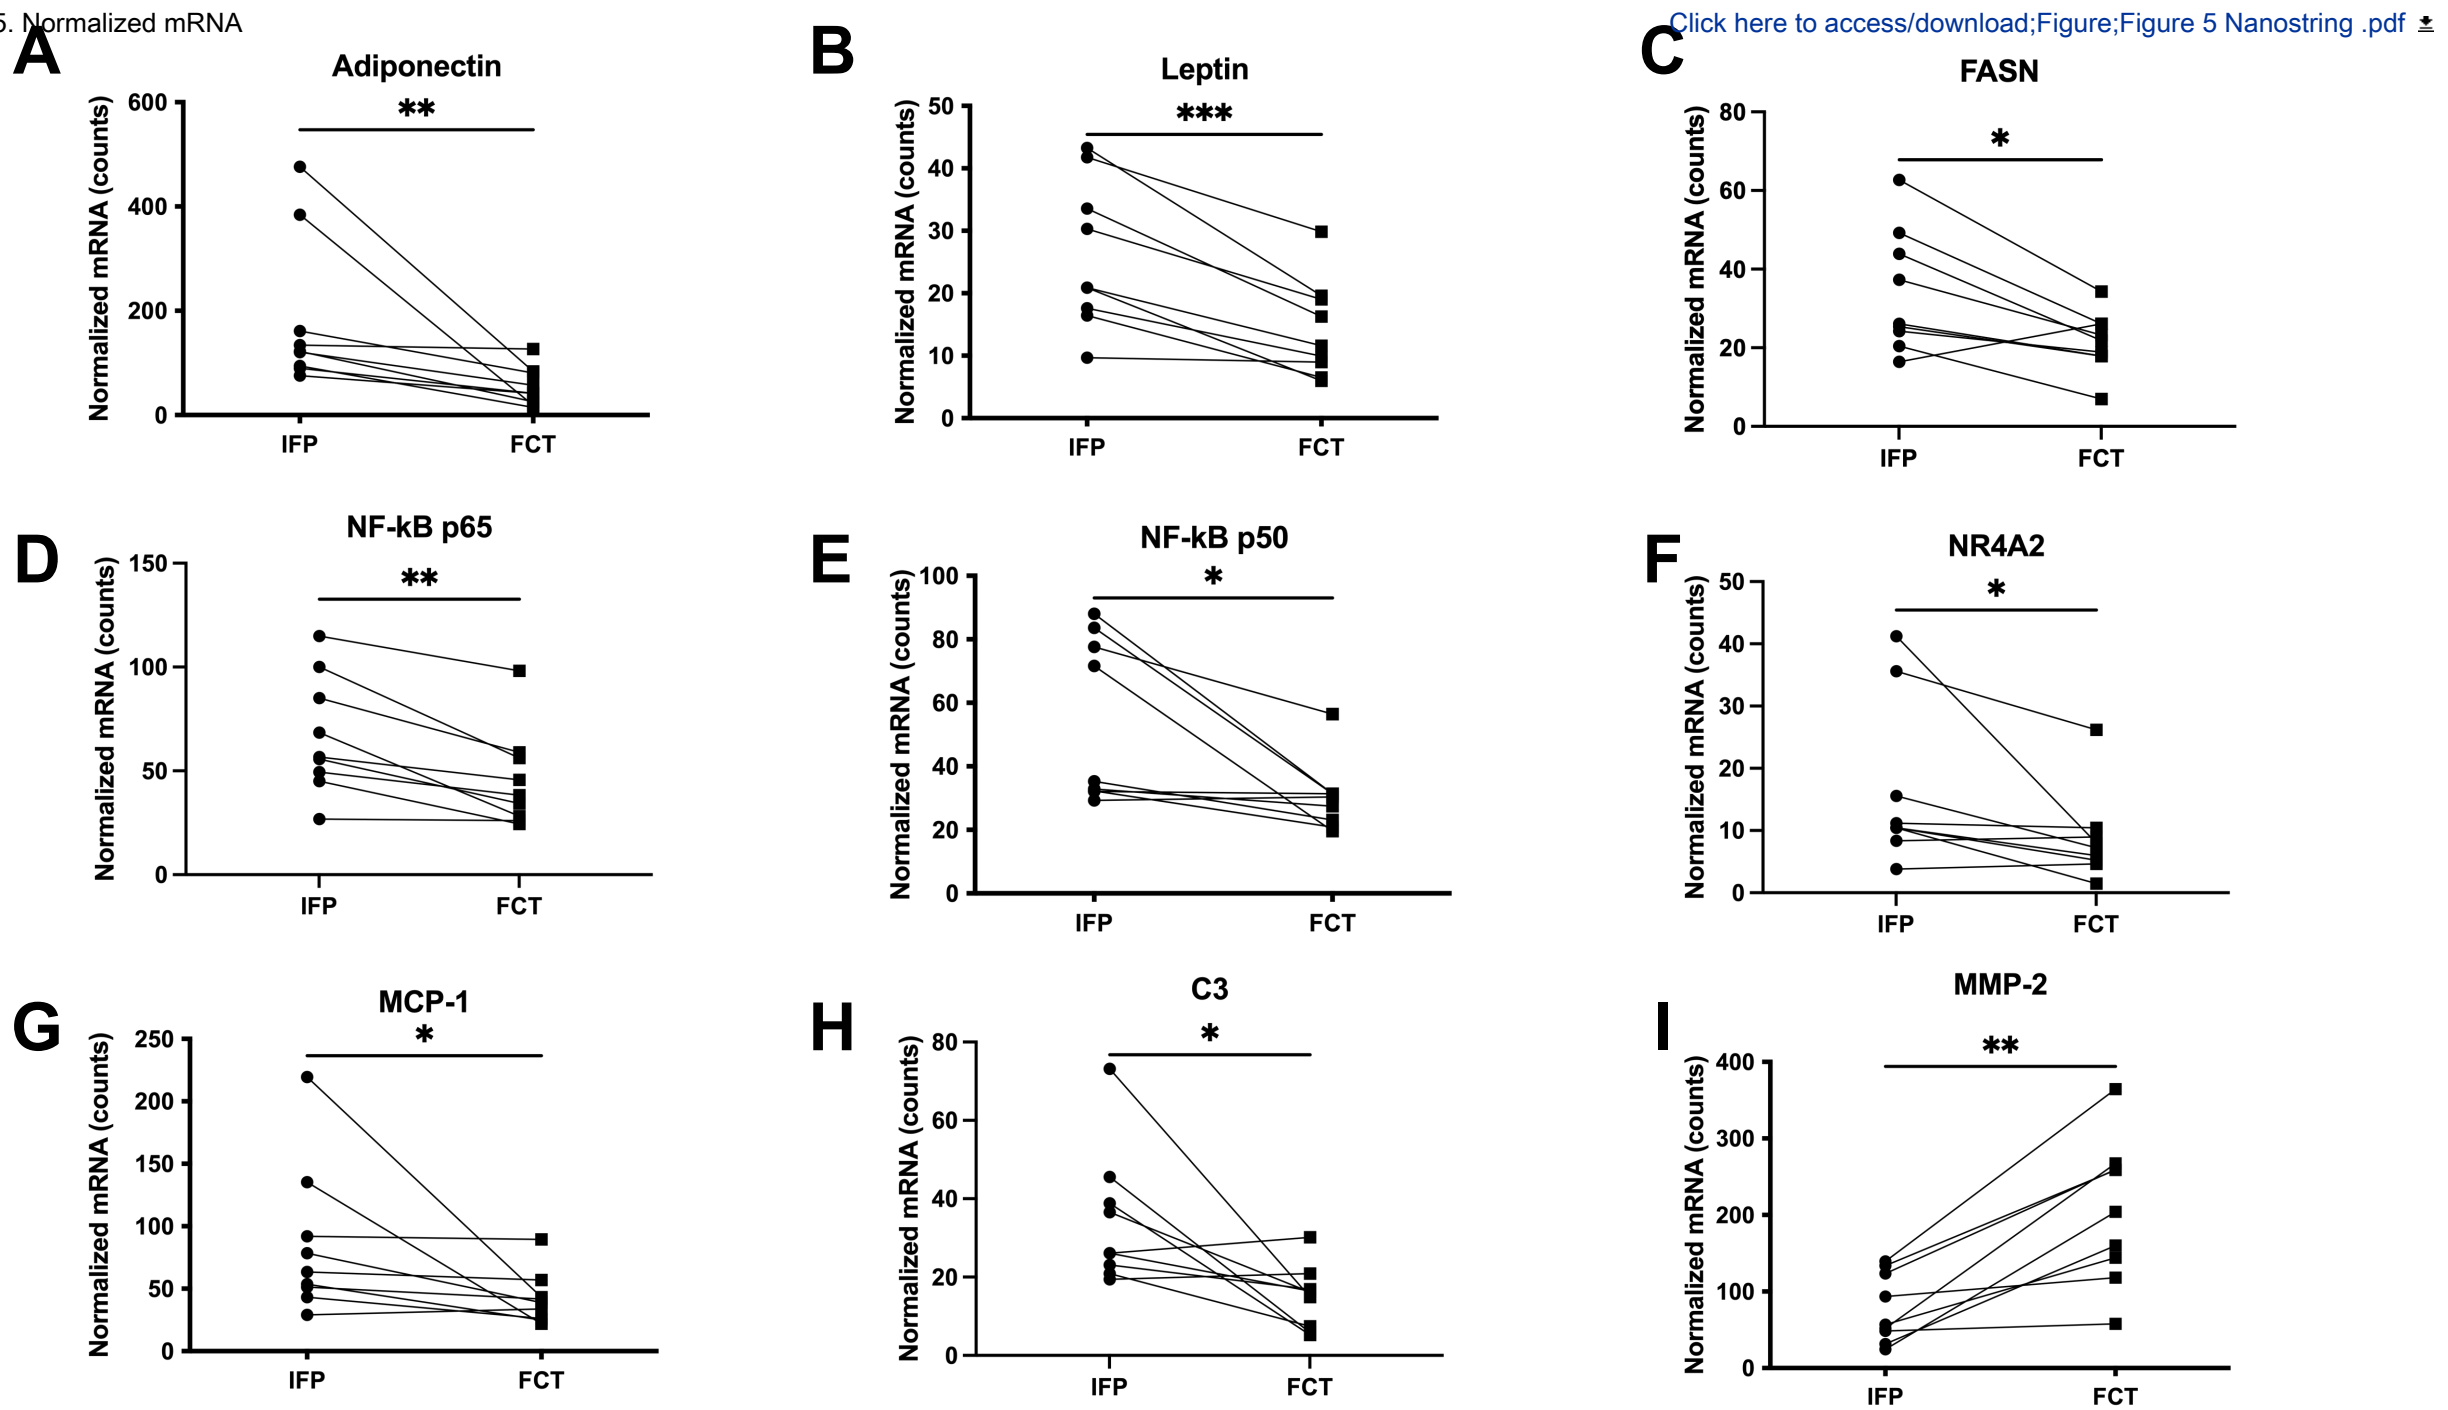



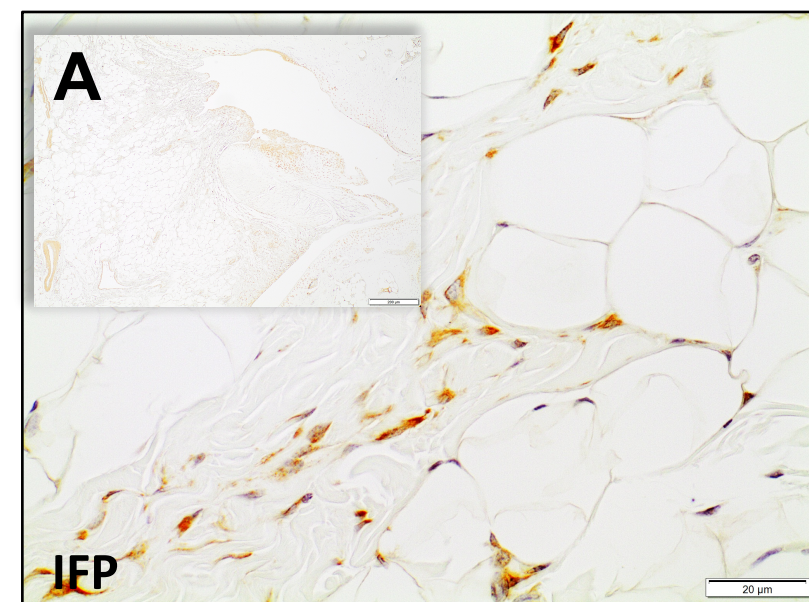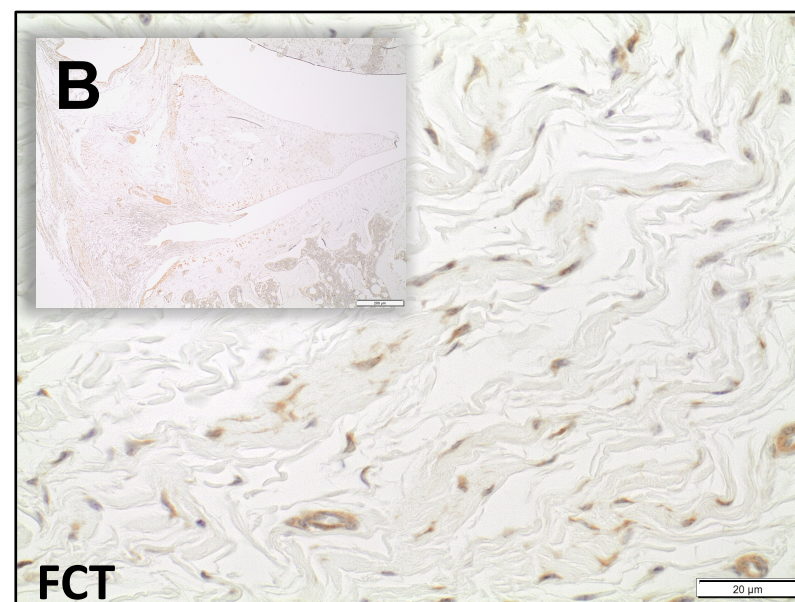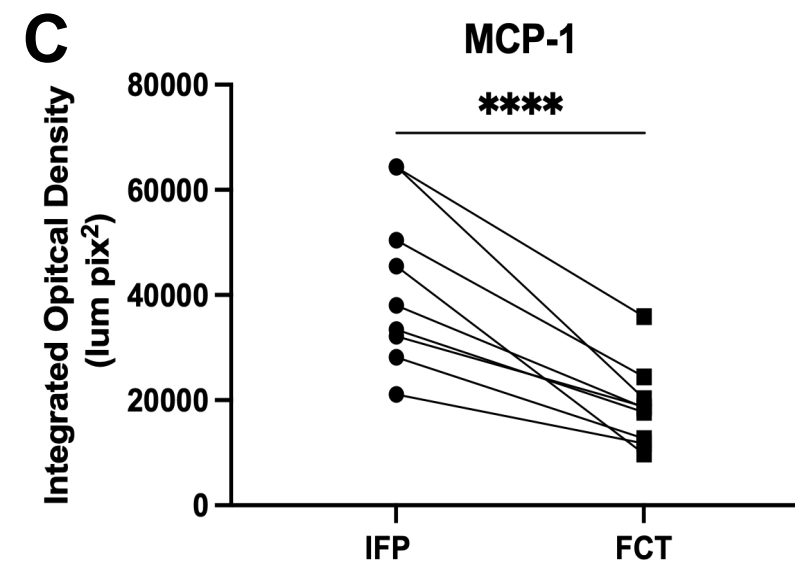

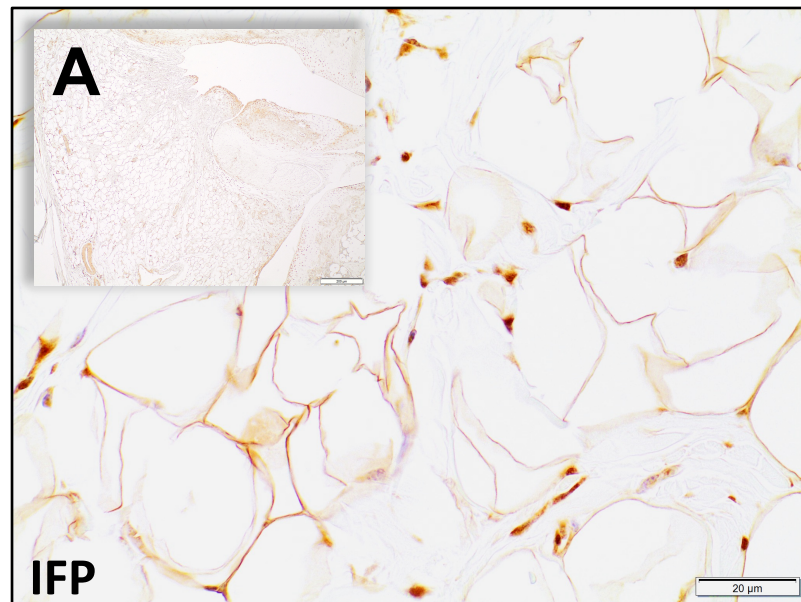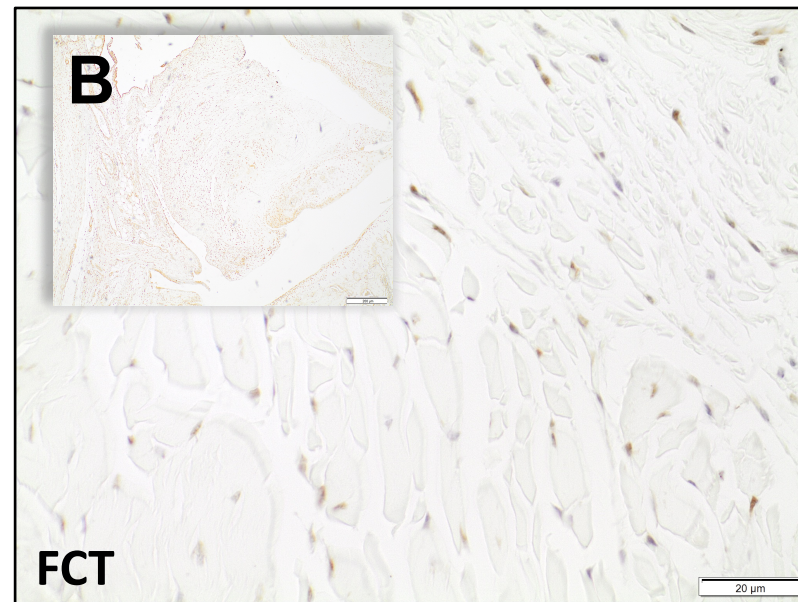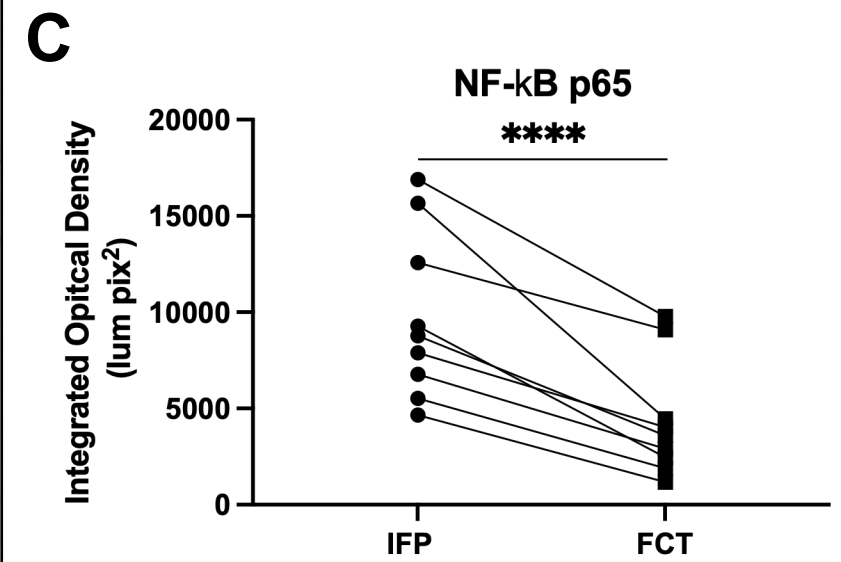

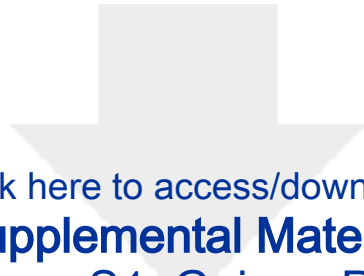

Click here to access/download

**Supplemental Material**

Supplemental Figure S1. Guinea Pig Description.pdf

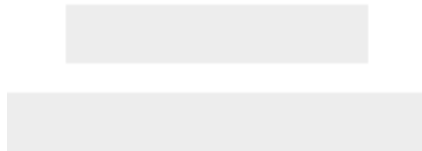



Click here to access/download

**Supplemental Material**

Supplemental Figure 2 Massons Trichrome  
quanitation.pdf

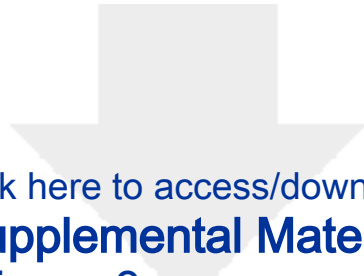

[Click here to access/download](#)

**Supplemental Material**

[Supplemental Figure 3 components of microct.pdf](#)

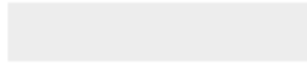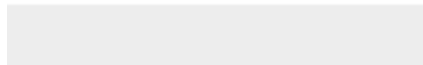

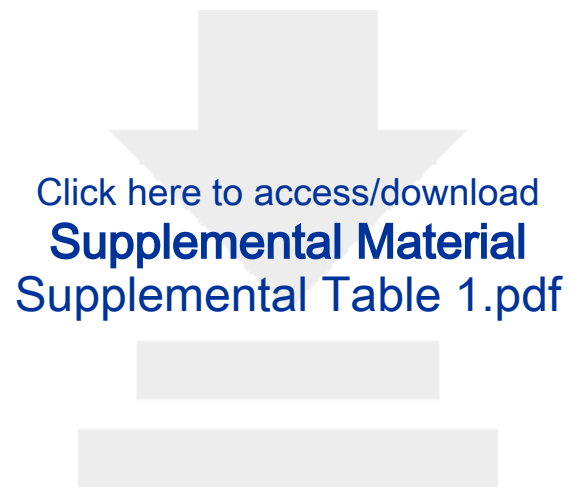

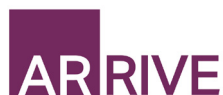

# The ARRIVE guidelines 2.0: author checklist

## The ARRIVE Essential 10

These items are the basic minimum to include in a manuscript. Without this information, readers and reviewers cannot assess the reliability of the findings.

| Item                                    | Recommendation                                                                                                                                                                                                                                                                                                                                                                                                                                                                                                                                                                                 | Section/line number, or reason for not reporting                                                             |
|-----------------------------------------|------------------------------------------------------------------------------------------------------------------------------------------------------------------------------------------------------------------------------------------------------------------------------------------------------------------------------------------------------------------------------------------------------------------------------------------------------------------------------------------------------------------------------------------------------------------------------------------------|--------------------------------------------------------------------------------------------------------------|
| <b>Study design</b>                     | 1 For each experiment, provide brief details of study design including: <ol style="list-style-type: none"> <li>The groups being compared, including control groups. If no control group has been used, the rationale should be stated.</li> <li>The experimental unit (e.g. a single animal, litter, or cage of animals).</li> </ol>                                                                                                                                                                                                                                                           | Contralateral Limb served as control for each animal.<br><br>Line 162                                        |
| <b>Sample size</b>                      | 2 <ol style="list-style-type: none"> <li>Specify the exact number of experimental units allocated to each group, and the total number in each experiment. Also indicate the total number of animals used.</li> <li>Explain how the sample size was decided. Provide details of any <i>a priori</i> sample size calculation, if done.</li> </ol>                                                                                                                                                                                                                                                | Line 162<br><br>Lines 159-162                                                                                |
| <b>Inclusion and exclusion criteria</b> | 3 <ol style="list-style-type: none"> <li>Describe any criteria used for including and excluding animals (or experimental units) during the experiment, and data points during the analysis. Specify if these criteria were established <i>a priori</i>. If no criteria were set, state this explicitly.</li> <li>For each experimental group, report any animals, experimental units or data points not included in the analysis and explain why. If there were no exclusions, state so.</li> <li>For each analysis, report the exact value of <i>n</i> in each experimental group.</li> </ol> | Lines 254-257<br><br>Lines 256-263<br><br>Figure legends<br>Lines 261-263                                    |
| <b>Randomisation</b>                    | 4 <ol style="list-style-type: none"> <li>State whether randomisation was used to allocate experimental units to control and treatment groups. If done, provide the method used to generate the randomisation sequence.</li> <li>Describe the strategy used to minimise potential confounders such as the order of treatments and measurements, or animal/cage location. If confounders were not controlled, state this explicitly.</li> </ol>                                                                                                                                                  | Contralateral limb served as interal control for each animal.<br>174-175<br><br>N/A                          |
| <b>Blinding</b>                         | 5 Describe who was aware of the group allocation at the different stages of the experiment (during the allocation, the conduct of the experiment, the outcome assessment, and the data analysis).                                                                                                                                                                                                                                                                                                                                                                                              | Lines 199-200<br>211-212                                                                                     |
| <b>Outcome measures</b>                 | 6 <ol style="list-style-type: none"> <li>Clearly define all outcome measures assessed (e.g. cell death, molecular markers, or behavioural changes).</li> <li>For hypothesis-testing studies, specify the primary outcome measure, i.e. the outcome measure that was used to determine the sample size.</li> </ol>                                                                                                                                                                                                                                                                              | Lines 158-251<br><br>Lines 159-162                                                                           |
| <b>Statistical methods</b>              | 7 <ol style="list-style-type: none"> <li>Provide details of the statistical methods used for each analysis, including software used.</li> <li>Describe any methods used to assess whether the data met the assumptions of the statistical approach, and what was done if the assumptions were not met.</li> </ol>                                                                                                                                                                                                                                                                              | Lines 264-267<br><br>Lines 267-267                                                                           |
| <b>Experimental animals</b>             | 8 <ol style="list-style-type: none"> <li>Provide species-appropriate details of the animals used, including species, strain and substrain, sex, age or developmental stage, and, if relevant, weight.</li> <li>Provide further relevant information on the provenance of animals, health/immune status, genetic modification status, genotype, and any previous procedures.</li> </ol>                                                                                                                                                                                                         | Lines 162-163; 271-273;<br>Supplemental Figure S1<br><br>N/A                                                 |
| <b>Experimental procedures</b>          | 9 For each experimental group, including controls, describe the procedures in enough detail to allow others to replicate them, including: <ol style="list-style-type: none"> <li>What was done, how it was done and what was used.</li> <li>When and how often.</li> <li>Where (including detail of any acclimatisation periods).</li> <li>Why (provide rationale for procedures).</li> </ol>                                                                                                                                                                                                  | 170-175<br><br>170-175<br><br>170-175; 177-183<br><br>177-183                                                |
| <b>Results</b>                          | 10 For each experiment conducted, including independent replications, report: <ol style="list-style-type: none"> <li>Summary/descriptive statistics for each experimental group, with a measure of variability where applicable (e.g. mean and SD, or median and range).</li> <li>If applicable, the effect size with a confidence interval.</li> </ol>                                                                                                                                                                                                                                        | Figure legends<br><br>Included in text for data described without accompanying graph (Lines 274,277-278,315) |
